# The coral microbiome: towards an understanding of the molecular mechanisms of coral–microbiota interactions

Amin R. Mohamed<sup>1</sup>, Michael A. Ochsenkühn<sup>1</sup>, Ahmed M. Kazlak<sup>2,3</sup>, Ahmed Moustafa<sup>2,3,4</sup>, Shady A. Amin<sup>1,5,\*</sup>

<sup>1</sup>Biology Program, New York University Abu Dhabi, Abu Dhabi 129188, United Arab Emirates

<sup>2</sup>Systems Genomics Laboratory, American University in Cairo, New Cairo 11835, Egypt

<sup>3</sup>Biotechnology Graduate Program, American University in Cairo, New Cairo 11835, Egypt

<sup>4</sup>Department of Biology, American University in Cairo, New Cairo 11835, Egypt

<sup>5</sup>Center for Genomics and Systems Biology (CGSB), New York University Abu Dhabi, Abu Dhabi 129188, United Arab Emirates

\*Corresponding author. New York University Abu Dhabi, Abu Dhabi 129188, United Arab Emirates. Tel: +971 2 628 5743; E-mail: [samin@nyu.edu](mailto:samin@nyu.edu)

Editor: [Bart Thomma]

## Abstract

Corals live in a complex, multipartite symbiosis with diverse microbes across kingdoms, some of which are implicated in vital functions, such as those related to resilience against climate change. However, knowledge gaps and technical challenges limit our understanding of the nature and functional significance of complex symbiotic relationships within corals. Here, we provide an overview of the complexity of the coral microbiome focusing on taxonomic diversity and functions of well-studied and cryptic microbes. Mining the coral literature indicate that while corals collectively harbour a third of all marine bacterial phyla, known bacterial symbionts and antagonists of corals represent a minute fraction of this diversity and that these taxa cluster into select genera, suggesting selective evolutionary mechanisms enabled these bacteria to gain a niche within the holobiont. Recent advances in coral microbiome research aimed at leveraging microbiome manipulation to increase coral's fitness to help mitigate heat stress-related mortality are discussed. Then, insights into the potential mechanisms through which microbiota can communicate with and modify host responses are examined by describing known recognition patterns, potential microbially derived coral epigenome effector proteins and coral gene regulation. Finally, the power of omics tools used to study corals are highlighted with emphasis on an integrated host–microbiota multiomics framework to understand the underlying mechanisms during symbiosis and climate change-driven dysbiosis.

**Keywords:** coral, microbiome, symbiosis, holobiont, multiomics

## Introduction

Corals are metaorganisms that depend on dynamic multipartite symbioses with diverse microbes. These interkingdom interactions between the multicellular eukaryotic coral host and its associated microbiota maintain homeostasis within this complex system and has underpinned its resilience for >500 million years (Jaspers et al. 2019, Robbins et al. 2019, Peixoto et al. 2021). Associations within the metaorganism comprise a large diversity of viruses, prokaryotes, and microeukaryotes that collectively are termed the coral holobiont (Rohwer et al. 2002, Rosenberg et al. 2007, Rosenberg and Zilber-Rosenberg 2018, Zilber-Rosenberg and Rosenberg 2021). Chief among the holobiont microbes, the primary endosymbiotic dinoflagellate of the family Symbiodiniaceae provides the bulk of the required nutritional needs to their coral hosts (Muscatine 1990, Morris et al. 2019). In addition, an increasing body of evidence is unraveling the key roles particular bacterial species in specific and general prokaryotic communities play in maintaining holobiont fitness, potentially via exchanging essential metabolites, recycling nutrient, and providing protection against pathogenic microbes (Bourne et al. 2016). In the Anthropocene era, climate change disrupts these symbiotic relationships, leading to dysbiosis that is characterized by the overgrowth of opportunistic and putatively pathogenic microbes and results in a compromised coral immune system, inevitably caus-

ing the onset of coral bleaching and/or disease (van Oppen and Blackall 2019). Most coral microbiome work has been exclusively focused on either endosymbiotic algae or bacteria, while ignoring the other, largely underexplored members of the coral microbiomes due to difficulties associated with studying their role in the holobiont. This imbalance hinders our detailed understanding of the coral holobiont system.

In this review, we provide the latest information on the taxonomic and functional diversity of members of the coral microbiome, focusing on (a) specific microbes that engage in beneficial or harmful interactions with their host, (b) the role these microbes presumably play in coral health or disease, (c) the potential mechanisms of coral–microbiome crosstalk and communication, and (d) new techniques and approaches to further our understanding of the coral holobiont. Our aim is to provide insights into the potential mechanisms through which coral–microbiome interactions occur, and how these mechanisms can be studied to unravel the governing principles of the coral holobiont ecology in a warming ocean.

## The coral holobiont

Corals are a reservoir for microbes that includes diverse species of bacteria, archaea, viruses, and microeukaryotes (Bourne et al. 2016), some of which are well-characterized while others are cryp-

Received: October 7, 2022. Revised: February 10, 2023. Accepted: February 15, 2023

© The Author(s) 2023. Published by Oxford University Press on behalf of FEMS. This is an Open Access article distributed under the terms of the Creative Commons Attribution-NonCommercial-NoDerivs licence (<https://creativecommons.org/licenses/by-nc-nd/4.0/>), which permits non-commercial reproduction and distribution of the work, in any medium, provided the original work is not altered or transformed in any way, and that the work is properly cited. For commercial re-use, please contact [journals.permissions@oup.com](mailto:journals.permissions@oup.com)

tic (Fig. 1). The best-known coral symbionts are select bacteria and members of the dinoflagellate family Symbiodiniaceae (collectively known previously as the genus *Symbiodinium*). Bacteria colonize all coral microhabitats including the surface mucous layer (SML), different tissue layers, and skeleton (Sweet et al. 2010, Pollock et al. 2018, van Oppen and Blackall 2019), while Symbiodiniaceae inhabit specific host-derived membrane structures called symbiosomes (Davy et al. 2012, Mohamed et al. 2016, Rosset et al. 2021) within the gastrodermis layer (Fig. 1). In addition, a plethora of under-explored microbes are also associated with corals, including newly discovered apicomplexan-related chromerids and corallicolids (Ainsworth et al. 2017, Clerissi et al. 2018, Kwong et al. 2019), endolithic algae, viruses, archaea, and fungi all with mostly unknown function (Fig. 1).

### Complex associations with the Symbiodiniaceae family

Symbiodiniaceae were the first and most important symbionts of corals to be recognized (Muscatine and Porter 1977, Bourne et al. 2016, LaJeunesse et al. 2018). They live exclusively in a host-derived compartment known as the ‘symbiosome’ that originates from the early endosome of the coral host following phagocytosis of these algal symbionts (Fig. 1) (Davy et al. 2012). The symbiosome membrane protects Symbiodiniaceae cells from lysosome degradation by the host (Mohamed et al. 2016) and mediates the mutual transport of nutrients between both taxa (Davy et al. 2012). Considered initially as a single species, *Symbiodinium microadriaticum* (Freudenthal 1962), this group of symbionts now comprises the recently established dinoflagellate family Symbiodiniaceae, which currently includes seven distinct genera (*Symbiodinium*—formerly known as Clade A, *Breviolum*—clade B, *Cladocopium*—clade C, *Durusdinium*—clade D, *Effrenium*—clade E, *Fugacium*—clade F, and *Gerakladium*—clade G) (LaJeunesse et al. 2018). Multiple reference genomes for Symbiodiniaceae are available (Shoguchi et al. 2013, Lin et al. 2015, Aranda et al. 2016, Gonzalez-Pech et al. 2021), including a chromosome-scale genome for *S. microadriaticum* (Nand et al. 2021). These genomes reveal that this family is taxonomically and functionally divergent, a fact reflected in their diverse functional repertoire (González-Pech et al. 2021).

The coral–Symbiodiniaceae symbiosis is likely highly complex as other endosymbiotic associations. Research indicates that metabolite exchange between Symbiodiniaceae and corals involve sugars, lipids, and nitrogen compounds (reviewed in Davy et al. 2012). However, these metabolites may vary in identity and importance among the various associations given the high divergence reported in the Symbiodiniaceae; despite this knowledge, the molecular mechanisms (pathways or molecules) that establish and maintain this interaction is unknown. Few insights into functions and pathways that could enable this symbiotic relationship were established using comparative genomics and transcriptomics (Aranda et al. 2016, Liu et al. 2018, Mohamed et al. 2020a). For example, Aranda et al. (2016) showed that Symbiodiniaceae genomes possess an extensive repertoire of carbon and nitrogen transporters that likely underpin their symbiotic lifestyle and ultimately influence their hosts’ physiology. Comparative analysis of four Symbiodiniaceae draft genomes against other dinoflagellate genomes revealed identification of gene families under positive selection that included genes involved in photosynthesis, transmembrane ion transport, amino acid synthesis and transport, and stress responses (Liu et al. 2018). These functions may enable Symbiodiniaceae to be ideal partners to corals. In addition, these processes were shown to be activated during early interactions with coral larvae. Metatranscriptomics revealed up-

regulation of specific algal genes involved in carbohydrate, lipid, and nitrogen metabolism, and transport of various metabolites (glycerol, glutamate, choline) during colonization of coral larvae (Mohamed et al. 2020b). More recently, simultaneous transcriptome, metabolome, and proteome data for three ecologically important Symbiodiniaceae isolates have become available (Camp et al. 2022). The availability of such large-scale omics data will inevitably increase our understanding of the molecular characteristics that underpin Symbiodiniaceae responses during their lifestyle changes and environmental stress.

### Diverse bacterial symbionts associated with corals

Corals harbour a diverse bacterial microbiome (Blackall et al. 2015), spanning 39 phyla (Huggett and Apprill, 2019), more than one-third of the bacterial phyla found in seawater (Chen et al. 2021). A proportion of these coral-associated bacterial assemblages are thought to support the health and resilience of corals (Bourne et al. 2016, Ziegler et al. 2019, Voolstra and Ziegler 2020, Meunier et al. 2021). Among the numerous bacterial phyla associated with corals, Proteobacteria, Bacteroidetes, Cyanobacteria, and Firmicutes are among the most abundant based on 16S rRNA gene phylogeny of 21 100 sequences derived from a public database (Huggett and Apprill, 2019). Moreover, a recent meta-analysis of 3055 bacterial isolates from 52 coral studies identified that most cultivable bacteria belonged to the Proteobacteria, Firmicutes, Bacteroidetes, and Actinobacteria phyla (Sweet et al. 2021).

The collective reef microbiome may rapidly respond to environmental stressors, such as ocean warming, eventually leading to reef microbialization. Reef microbialization is characterized not only by a shift in abundance and biomass towards microbes, but more of a shift towards a pathogenic assemblage that can trigger major declines (Haas et al. 2016). Coral-associated bacteria inhabit several compartments within the coral, such as the SML, tissues, gastric cavity, and skeleton (Fig. 1) (Pollock et al. 2018, van Oppen and Blackall 2019, Vanwongerghem and Webster 2020). Distinct physiochemical properties and environmental gradients, including pollution (Wangpraseurt et al. 2016, Pernice et al. 2020) play an important role in shaping the microbial composition within these compartments (Sweet et al. 2010, Leite et al. 2018, Pollock et al. 2018). Bacterial composition varies across these different niche compartments with some bacteria preferentially colonizing specific compartments. For example, bacteria belonging to the genera *Chloroflexi*, *Sphingobacterium*, *Roseobacter*, and *Pseudoalteromonas* were found exclusively in the SML (Sweet et al. 2010), while *Endozoicomonas* were found within aggregates inside coral tissues (Neave et al. 2017). This niche specificity suggests certain bacteria are adapted to the local microenvironment within the coral colony (Ritchie and Smith 2004), which ultimately leads to particular interactions with the host within each microenvironment. More diverse bacterial communities have been reported in the coral skeleton compared to those in the coral tissue or the SML (Pollock et al. 2018).

Nitrogen cycling is common within corals [reviewed in Rådecker et al. (2015)]. Diazotrophs are consistently associated with coral tissues (Rohwer et al. 2002, Lema et al. 2012, Olson and Lesser 2013), particularly in early life stages (larvae and juveniles) (Lema et al. 2014), indicating the potential importance of nitrogen fixation in the coral holobiont. Ammonium generated from nitrogen fixation may be partially oxidized by communities of ammonia oxidizing bacteria and archaea (Beman et al. 2008, Siboni et al. 2008, Yang et al. 2013). Likewise, denitrifying bacteria have also been reported in corals (Kimes et al. 2010, Yang et al. 2013).

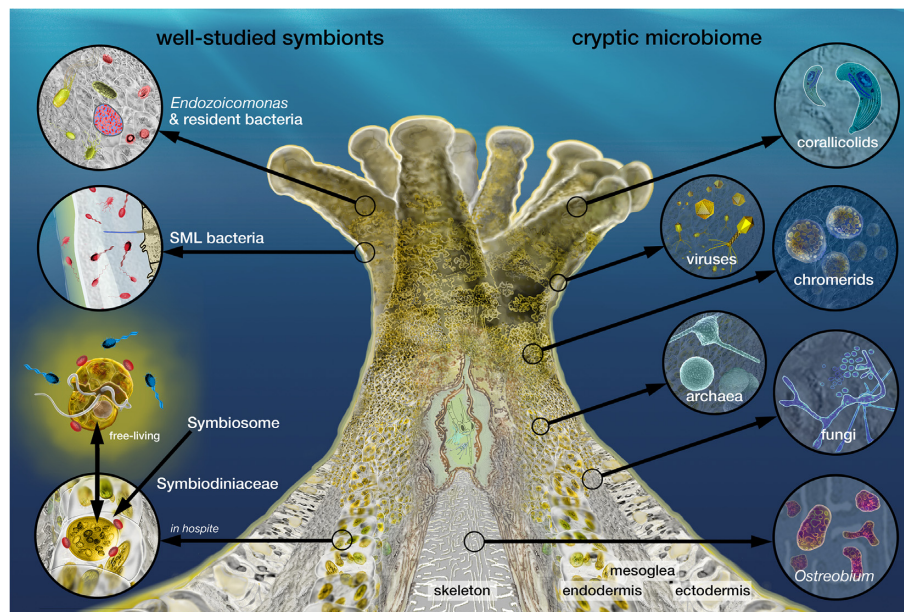

**Figure 1.** The diverse microbiome of corals. The coral-associated microbiome is distributed across specific locations in a coral colony and is composed of diverse microbes spanning the three domains of life. Symbiodiniaceae and bacteria are among the most-studied coral symbionts (left). Symbiodiniaceae are localized within specialized coral structures called symbiosomes within the gastrodermis layer and are by far the best-studied symbiont of corals. Resident bacteria are found in most coral microhabitats, including the SML, coral tissue, and skeleton. Recent work on resident bacteria focuses on the importance of *Endozoicomonas* spp. as putative obligate coral symbionts. Most of the coral microbiome is considered cryptic, with mostly unknown roles in holobiont homeostasis (right). Some of these members can be endosymbiotic (e.g. corallicolids), while others appear to be epibionts (e.g. Chromerids). Evidence suggests some archaea may be involved in nitrogen cycling, viruses may be important in maintaining microbiome homeostasis, while endolithic communities (*Ostreobium* and fungi) are implicated in primary production.

More recently, Rädcker et al. (2022) have reported the tight relationship between disturbance in nitrogen cycling and coral bleaching. However, the molecular mechanisms by which the nitrogen-related activities of these microbial communities are coupled are largely unknown.

Like all phytoplankton, Symbiodiniaceae associate with bacteria that play a role in their physiology and influence nutrient availability (Seymour et al. 2017). Members of the family Rhodobacteraceae are universally found among many phytoplankton lineages, including numerous Symbiodiniaceae cultures, and have been shown to play major roles in providing essential nutrients, hormones, and cofactors to phytoplankton (Cirri and Pohnert 2019). For example, *Mameliella alba* was shown to enhance the growth of Symbiodiniaceae in co-culture (Varasteh et al. 2020), similar to how other Rhodobacteraceae bacteria enhance the growth of diatoms (Amin et al. 2015) and coccolithophores (Segev et al. 2016). While Symbiodiniaceae–bacteria co-culture experiments are reductive, interactions between both taxa are hypothesized to occur within coral symbiosomes (Garrido et al. 2021). Indeed, nitrogen transfer between bacterial isolates labelled with  $^{15}\text{N}$  and Symbiodiniaceae cells has been observed at the single-cell level in the coral *Pocillopora damicornis* (Ceh et al. 2013). Despite these findings, information on specific coral symbionts, opportunists, parasitic, and commensal bacteria and their importance to the coral holobiont is scarce.

### Cryptic diversity of the coral microbiome

In addition to Symbiodiniaceae and bacteria, corals are home to a plethora of other microorganisms, including viruses, archaea, fungi (Bourne et al. 2016, Ainsworth et al. 2017, Clerissi et al. 2018), and microeukaryotes, including the apicomplexan-like Chromerids (Moore et al. 2008, Janoušek et al. 2012) and the recently discovered apicomplexans Corallicolids (Kwong et al. 2019,

Keeling et al. 2021). Below is a brief discussion of these mostly cryptic organisms.

### Apicomplexans and related organisms

Early work has isolated and identified several lineages of apicomplexans associated with corals. *Gemmocystis cylindrus* was isolated from the gastrodermal cells of multiple corals (Upton and Peters 1986). Further molecular evidence of the existence of related apicomplexans included detection of DNA fragments in Caribbean corals (Toller et al. 2002, Kirk et al. 2013). Analysis of plastid rRNA sequences derived from coral reef environments revealed eight distinct, novel apicomplexan-related lineages associated with corals (Janoušek et al. 2012). Two of these lineages, *Chromera velia* (Moore et al. 2008) and *Vitrella brassicaformis* (Obornik et al. 2012), comprise photosynthetic alveolates of the phylum Chromerida that are commonly associated with corals worldwide, and are considered the closest known photosynthetic relatives of Apicomplexan parasites (Moore et al. 2008, Janoušek et al. 2013). More recently, a third apicomplexan taxon has been found ubiquitously associated with corals, potentially being the second most abundant microeukaryotic group in coral tissues after Symbiodiniaceae (Kwong et al. 2019). This taxon belongs to corallicolids (Kwong et al. 2019), a lineage that may be ubiquitous in the oceans including in metagenomes of deep-sea corals (Vohsen et al. 2020). Little is known about the biology of corallicolids or their influence on coral health/fitness, but it is unlikely that corallicolids have a mutualistic relationship with corals (Keeling et al. 2021). A recent transcriptomic study revealed that the coral host response to *C. velia* inoculation was similar to that of parasite or pathogen infection in vertebrates, suggesting that their relationship with corals is not beneficial (Mohamed et al. 2018). Further work is needed to employ inoculation experiments

and subsequent time-series multiomics analyses to elucidate the nature of the coral–corallicolids association.

### Endolithic algae and fungi

Endolithic algae form dense bands visible to the naked eye in the skeleton of many coral species and are often dominated by the filamentous green alga *Ostreobium* spp. (Chlorophyta) (Fig. 1) (Korrmann and Sahling 1980). Molecular studies revealed highly diverse communities within this group of green algae (Marcelino and Verbruggen 2016, Del Campo et al. 2017, Verbruggen et al. 2017, Marcelino et al. 2018). More than 120 operational taxonomic units at the near-species level have been reported from 132 coral skeleton samples collected from multiple coral species (Marcelino and Verbruggen 2016). These endolithic communities were shown to substantially vary in identity among coral species. Marcelino et al. (2018) reported a more diverse endolithic community in the massive coral *Porites* spp. compared to the branching species *Seriatopora hystrix* and *Pocillopora damicornis*, suggesting that endolithic algae contribute to the resilience of the former to environmental stress. *Ostreobium* colonizes the skeleton of coral juveniles during their development (Masse et al. 2018) and can interact with the coral tissue through transfer of photosynthates (Schlichter et al. 1995, Fine and Loya 2002, Pernice et al. 2020), particularly after bleaching (Iha et al. 2021), and by enhancing coral recovery post-bleaching via reducing skeletal light reflectance (Galindo-Martinez et al. 2022).

Fungi are known to be associated with many sessile marine invertebrates including corals and sponges (Yarden 2014). In corals, fungi are found in newly deposited coral skeleton along with *Ostreobium* (Le Campion-Alsumard et al. 1995, Golubic et al. 2005), exhibiting rapid growth to match skeletal accretion (Le Campion-Alsumard et al. 1995). Fungi were identified as the most abundant microbes in the metagenome of *Porites astreoides*, contributing more than a third of the total microbial sequences (Wegley et al. 2007). Despite their ubiquitous associations with corals (Yarden 2014), including deep-sea corals (Marchese et al. 2021), their functions remain largely underexplored (Roik et al. 2022). Histological studies show widespread fungal invasion in corals infected with the coral disease white syndrome (Work and Aeby 2006, Howells et al. 2020) [reviewed in Sexton and Howlett (2006)]. In our recent work, reads belonging to the phylum Ascomycota in metagenomes of *Acropora* spp. under heat stress were observed, with higher relative abundance in colonies infected with white syndrome, potentially implicating them in disease manifestation (Amin et al., personal communication). Similarly, more diverse fungal communities were found in *Acropora hyacinthus* colonies living in warm pools compared to colder pools; these communities were also more transcriptionally active in warmer conditions (Amend et al. 2012), implicating them in responses to heat stress.

### Archaea

Corals are associated with diverse archaeal species, mainly representatives from the phyla Thermoproteota (also known as Crenarchaeota) and Euryarchaeota. Members of the Thermoproteota are the most commonly reported followed by Marine Group II and Thermoplasma of the Euryarchaeota (Kellogg 2004, Siboni et al. 2008). Archaea can comprise up to half of the prokaryotic community on the SML of some corals (Wegley et al. 2004). Despite their abundance, the functional roles of archaea within the coral holobiont have not been experimentally validated. However, they are often implicated in nitrogen recycling and ammonia oxidation within the SML (Siboni et al. 2008, 2012). Two metagenomically assembled genomes (MAGs) that belong to the Nitrososphaerota

(syn. Thaumarchaeota) phylum were assembled from metagenomic reads of the coral *Porites lutea* (Robbins et al. 2019) and revealed the presence of symbiosis-related metabolic pathways, including a reductive tricarboxylic acid cycle and cobalamin biosynthesis, suggesting these archaeal genomes might contribute essential vitamins or dissolved carbon to the host (Robbins et al. 2019).

### Viruses

A wide range of coral species and associated microbes are reported to harbour virus-like particles (Wilson et al. 2004, Marhaver et al. 2008, Brüwer et al. 2017). Metagenomic sequencing show a high diversity of coral-associated DNA and RNA viruses (Weynberg et al. 2014). Large metagenomic and metatranscriptomic sequencing efforts towards establishing a ‘coral virome’ conducted across 101 cnidarian samples from the Red Sea documented DNA and RNA viral assemblages associated with corals (Cardenas et al. 2020) [for a recent review on the roles of viruses in corals see Ambalavanan et al. (2021)]. While the functional roles of coral-associated viruses are still unclear, they likely play important roles in the coral holobiont. The presence of some bacteriophages in the coral SML may regulate the abundance of specific bacteria via targeted infection/lysis (Barr et al. 2013). Viral genes can encode for complementary functions that may be beneficial to the holobiont (Thurber et al. 2017). For example, some coral-associated viruses have genes related to photosynthesis that may alleviate and/or delay damage to Symbiodiniaceae photosystems at higher temperatures (Weynberg et al. 2017). In addition, Knowles et al. (2016) unexpectedly reported a decrease in viral abundance in reefs with high microbial abundance and suggested a lytic-to-lysogenic shift with increased microbial densities. This novel host-viral dynamic has been proposed as a mechanism of reef microbialization (Haas et al. 2016).

However, viruses can also be detrimental to corals. Under various stress conditions, the coral-associated viral consortium exhibits an increase in herpes-like viruses, similar to other cnidarians (Thurber et al. 2008). Temperature-induced latent infection is also suggested to confer virulence to specific coral pathogens that could lead to the onset of coral disease (Weynberg et al. 2014, Work et al. 2021).

## Functions of coral-associated microbes

### Coral–Symbiodiniaceae symbiosis, the engine of the holobiont

The symbiotic relationship between corals and Symbiodiniaceae enabled the construction of the reef (calcium carbonate skeleton) via bidirectional nutrient exchange (Pogoreutz et al. 2020). The symbiosis relies on reciprocal metabolite exchanges, where Symbiodiniaceae share excess photosynthetically derived dissolved organic matter with the coral host in exchange for access to inorganic nutrients and CO<sub>2</sub> generated from respiration (Muscatine 1990, Falkowski et al. 1993, Cunning et al. 2017). Indeed, the sharing of organic photosynthates by Symbiodiniaceae (e.g. glucose) is energetically sufficient for the host to meet 100% of its respiratory requirements (Muscatine and Porter 1977, Bourne et al. 2016).

Although corals are capable of assimilating ammonium to acquire nitrogen, Symbiodiniaceae are responsible for most inorganic nitrogen uptake in the forms of nitrate and ammonium (Pernice et al. 2012). A proportion of this nitrogen is shared with the coral host in the form of dissolved organic nitrogen (e.g. amino acids) (Wang and Douglas 1999, Yellowlees et al. 2008, Reynaud et al. 2009). However, high concentrations of inorganic nitrogen

have been shown to destabilize the symbiosis. Increasing nitrogen fixation leads to an increase in nitrogen availability that subsequently increases cell division rates of the symbiont; this increase alters the N:P ratio within corals and causes phosphate limitation (Wiedenmann et al. 2013). Thus, corals control the growth of their symbionts by regulating access to inorganic nitrogen (Wooldridge 2013). Indeed, this nitrogen-budget balance is critical for the maintenance of the symbiotic relationship and further 'fine-tuning' of its outcome is evident from prokaryotic members of the coral microbiome (see below) (Cui et al. 2019). More recently, Rädercker et al. (2021) showed that coral bleaching can be correlated with disrupted nutrient cycling during heat stress, where the increased energetic demand of the host during heat stress leads to increased catabolism of amino acids, a more rapid release of ammonium concomitant with promotion of the growth of algal symbionts and retention of photosynthates.

In addition to central metabolites, such as sugars and amino acids, Symbiodiniaceae produce mycosporine-like amino acids, pigments (e.g. fucoxanthin) and carotenoids, which collectively protect against UV radiation and reactive oxygen species (ROS) (Rosic and Dove 2011, Rosic 2019, Roach et al. 2021). Symbiodiniaceae-derived glucosides can serve as energy storage molecules, osmolytes, and antioxidants (Ochsenkühn et al. 2017, Gegner et al. 2019), which may protect photosystem II from free radicals. Other metabolites such as glycerolipids, betaine lipids, and tocopherols that are produced by both host and symbiont are hypothesized to stabilize cellular membranes, assist protein renaturation, and act as antioxidants during heat stress (Hillyer et al. 2017b, Rosset et al. 2017, Roach et al. 2021) and disease (Deutsch et al. 2021). Symbiodiniaceae possess the necessary genes to produce essential steroid precursors like squalenes and lanosterols that corals and other cnidarians either acquire through heterotrophic feeding or through their symbionts (Baumgarten et al. 2015). In addition to these exchanges, it is likely that the coral-Symbiodiniaceae relationship involves dozens to hundreds of metabolites that regulate their complex symbiosis, akin to most well-studied symbiotic systems, for which our knowledge is lacking. Further work is needed to shed light on these chemicals and their role in nurturing healthy corals.

### Beneficial coral-associated bacteria can boost coral health and resilience

While the putative symbioses between the coral host and specific bacterial species is obscure when compared to Symbiodiniaceae, recent evidence suggests there are specific bacterial symbionts that benefit their coral host. Mining the literature, we assembled a list of bacteria that are hypothesized to be beneficial to corals based on experiments either *in situ* or in the laboratory (Supplementary Table S1). Interestingly, thus far evidence shows that most bacteria that confer benefit to the holobiont belong mostly to the  $\alpha$ - and  $\gamma$ -proteobacteria and to a lesser extent the Actinobacteria, Actinomycetia, Cytophagia, Flavobacteriia, Bacilli, and Oligoflexia classes (Fig. 2 and Supplementary Table S1). The limited number of classes that have been found to be beneficial to corals relative to bacterial orders in seawater suggests there are selection mechanisms that enable corals to form beneficial interactions with such bacteria. Below is a discussion of some of these bacteria and the potential roles they play in benefitting the holobiont.

Tissue-localized members of the coral microbiome, such as bacteria of the genus *Endozoicomonas* (Fig. 2), are hypothesized to be a core symbiont of corals as they are ubiquitously found across a wide range of coral species from diverse geographic locations

(Neave et al. 2017, Ziegler et al. 2017, Pogoreutz et al. 2018), including deep-sea corals (Kellogg and Pratte 2021) and form highly stable association with such corals even during bleaching [reviewed in Hernandez-Agreda et al. (2016, 2018, 2019)]. In addition, the relative abundance of *Endozoicomonas* is often strongly correlated to coral health (Bayer et al. 2013, Roder et al. 2015, Neave et al. 2016) with abundance generally high in healthy corals and lower in stressed, bleached, and diseased corals (Bourne et al. 2008, Meyer et al. 2014, Morrow et al. 2015). Based on these observations, it has been suggested that *Endozoicomonas* may be important for coral holobiont health, but its symbiotic exchanges with the holobiont have yet to be identified. *Endozoicomonas* harbour large numbers of genes involved in amino acid synthesis and carbohydrate cycling, prompting suggestions that it is involved in holobiont nutrient cycling (Neave et al. 2017). A recently published *Endozoicomonas* MAG from a *Porites* deep shotgun metagenome study contained genes essential for the biosynthesis of cobalamin, which is a vitamin required for methionine synthesis by both corals and Symbiodiniaceae (Robbins et al. 2019). This MAG also encoded the enzyme DMSO reductase that converts DMSO to DMS, providing a means to recycle dissolved organic sulphur (Robbins et al. 2019). More recently, the genome of *Endozoicomonas acroporae* was shown to encode a DMSP CoA-transferase/lyase gene (*dddD*), capable of metabolizing DMSP into DMS (Tandon et al. 2020). DMSP metabolism may play a role in structuring the holobiont microbial community (Raina et al. 2013). Finally in response to coral tissue extract additions, *E. marisrubri* was shown to differentially express genes putatively involved in symbiosis establishment, e.g. flagellar assembly, ankyrins, ephrins, and serpins. Proteins involved in vitamin B<sub>1</sub> and B<sub>6</sub> biosynthesis were also upregulated (Pogoreutz et al. 2022).

Many studies have examined the ability of natural bacteria in coral microbiomes to inhibit or prey on coral pathogens. Several strains of *Ruegeria* spp. (Fig. 2) were found to inhibit the growth of the coral pathogen *Vibrio coralliilyticus* and other *Vibrio* spp. (Miura et al. 2019). *Ruegeria* spp. have also been implicated as indicator species in healthy coral microbiomes (Rosado et al. 2019). Reef-building corals were challenged with *V. coralliilyticus* in the presence or absence of the *Vibrio* predator *Halobacteriovorax* sp. PA1 (Fig. 2), which is commonly found at low abundance on coral surfaces (Welsh et al. 2016, Zaneveld et al. 2016). Inoculation of corals with *V. coralliilyticus* induced major changes in the microbiome, especially a large increase in relative abundance of *Vibrio* spp., a reduced microbiome stability and proliferation of opportunists, such as Rhodobacterales and Cytophagales. In contrast, co-inoculation of the corals with both bacteria eliminated the increase in *Vibrio* spp. and prevented the proliferation of opportunists (Welsh et al. 2017). *Pseudovibrio* sp. P12 (Fig. 2) was shown to produce the antimicrobial metabolite tropodithietic acid, potentially through metabolizing coral DMSP, to inhibit the growth of *V. coralliilyticus* and *V. owensii* (Raina et al. 2016). More recently, the beneficial role of degrading excess DMSP during heat stress has been validated (Santoro et al. 2021). Enrichment of a DMSP degrading bacterium is associated with a significant increase of DMSP degradation and a concomitant coral holobiont physiological improvement, resulting in higher survival rates.

Scavenging of ROS is a common mechanism by which bacteria can benefit a eukaryotic host, and has also been recently suggested as a beneficial mechanism for corals (Peixoto et al. 2017). In corals, several bacterial species were shown to detoxify radicals and ROS mainly by producing ROS-reactive pigments. These include *Fabibacter pacificus*, *Paracoccus marcusii*, and *Pseudoalteromonas shioyasakiensis* (Fig. 2) (Varasteth et al. 2021). Six strains of bacteria belonging to *Alteromonas macelodii*, *A. oceani*, *Roseibium aggregata*,

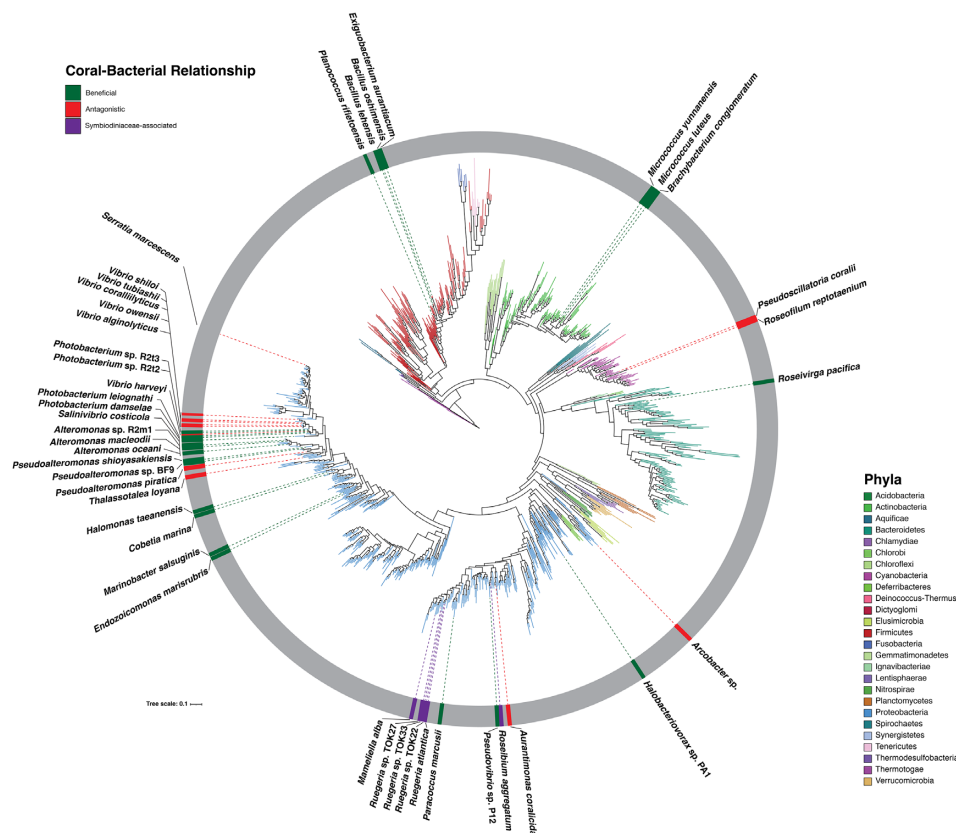

**Figure 2.** Relationship and diversity of bacterial species associated with corals based on previous research. Coral microbiome data were retrieved from SILVA (Quast et al. 2013) based on a literature search and mapped onto the prokaryotic tree of life (Hug et al. 2016). Additional sequences were merged into the original alignment by Hug et al. (2016) using MAFFT (Katoh et al. 2002). A maximum likelihood tree was constructed using FastTree (Price et al. 2010). In cases where 16S rRNA sequences were not available in the database, the branches were substituted with their closest available neighbour. Only taxa with some experimental evidence as to their relationship to corals were included. Beneficial, antagonistic (opportunists and pathogens), and Symbiodiniaceae-associated bacterial species (highlighted in the outer ring) are clustered in different parts of the tree. The tips of the branches are colour-coded according to the taxonomic classification. Generally, clusters of closely related bacterial species have similar relationships within coral microbiomes. For example, Symbiodiniaceae-associated bacteria mostly belong to the family Rhodobacteraceae, species belonging to the genus *Vibrio* are mostly antagonistic, while species belonging to the genera *Alteromonas* and *Photobacterium* are beneficial. Interestingly, members of the same genus do not always have the same relationship. For example, members of *Pseudoalteromonas* can be beneficial or antagonistic. A full list of bacteria depicted here and their references are provided in Supplementary Table S1.

*Marinobacter salsuginis*, *Micrococcus luteus*, and *M. yunnanensis* (Fig. 2) were shown to remove oxygen radicals from the coral model *Exaiptasia diaphana* (Dungan et al. 2021). SML-associated bacteria (Fig. 1) can be an important source of antibiotics that fend off pathogen colonization (Ritchie 2006, Engelen et al. 2018) and isolates of *Pseudoalteromonas* strains from *O. patagonica* SML were active against the coral pathogens *V. shiloi*, *V. coralliilyticus*, and *Thalassomonas loyana* (Shnit-Orland et al. 2012).

### Symbiodiniaceae–bacterial interactions, a forgotten partnership in a complex symbiotic network

Much of our understanding of the symbiotic relationships within the holobiont stems from host interaction with either Symbiodiniaceae or cultivated bacteria; in contrast, little is known about Symbiodiniaceae–bacteria interactions. Recent work has revealed complex metabolite exchanges between phytoplankton and their associated microbiome occurring within a microscale diffusive boundary layer surrounding phytoplankton cells, known as the phycosphere (Amin et al. 2012, Seymour et al. 2017). Symbiodiniaceae strains in culture harbour different bacterial communities in the phycosphere with abundances exceeding those of the algal cells by almost two orders of magnitude (Ritchie 2012, Lawson et al. 2018). Among these diverse communities,

members of the genera *Marinobacter*, *Roseibium* (formerly *Labrenzia*), *Muricauda*, *Hyphomicrobium*, *Methylobacterium*, and members of the families Rhodobacteraceae/Roseobacteraceae (e.g. *Ruegeria*, *Mameliella*) have been consistently detected in Symbiodiniaceae cultures (Ritchie 2012, Lawson et al. 2018, Camp et al. 2020, Varasteh et al. 2020, Maire et al. 2021) [reviewed in Matthews et al. (2020)]. Some of these taxa have been shown to be symbiotic with different phytoplankton lineages. For example, *Marinobacter* spp. provide a bioavailable source of iron to dinoflagellates and some diatom species in iron-limited environments (Amin et al. 2009). In Roseobacteraceae, *Ruegeria pomeroyi* has been shown to provide vitamins to diatoms in exchange for organic sulphur compounds (Durham et al. 2015). *Sulfitobacter pseudonitzschiae* and *Phaeobacter inhibens* convert the diatom- and coccolithophore-secreted amino acid tryptophan to the hormone indole acetate, respectively, which enhances the algal cell division rate (Amin et al. 2015, Segev et al. 2016). *Sulfitobacter pseudonitzschiae* and *Phaeobacter* spp. have also been shown to successfully colonize the phycosphere of diatoms (Fei et al. 2020) by efficiently responding to host secondary metabolites (Shibl et al. 2020).

Among the Roseobacteraceae, *Mameliella alba* has been consistently isolated from dinoflagellate cultures (Li et al. 2019, Varasteh et al. 2020, Lin et al. 2021, Ren et al. 2022) and appears to enhance

the growth rate of the dinoflagellates *Symbiodinium* sp., *Alexandrium catanella*, and *Karenia brevis* (Varasteh et al. 2020, Lin et al. 2021, Ren et al. 2022, Amin et al., personal communication), suggesting they produce a growth-promoting hormone. Axenic Symbiodiniaceae cultures originating from the coral *Galaxea fascicularis* have been shown to exhibit a decrease in photosystem II maximum quantum yield and an increased production of ROS. A *Muricauda* sp. (Fig. 2) isolated from xenic Symbiodiniaceae was subsequently shown to protect Symbiodiniaceae Photosystem II from ROS via production of the antioxidant Zeaxanthin (Motone et al. 2020). Despite these advances, no information is currently available on microbial communities associated directly with the Symbiodiniaceae phycosphere within coral symbiosomes [for a recent review see Garrido et al. (2021)]. Matthews et al. (2020) hypothesized that Symbiodiniaceae-associated bacterial consortia regulate Symbiodiniaceae productivity and thus the symbiotic interactions with corals. Future research should exploit recent advances in microfluidics, single-cell sequencing, and metabolomics to uncover the metabolic interaction between Symbiodiniaceae and bacteria within the coral host that are likely central to the holobiont fitness.

### Microbial dysbiosis is triggered by environmental stress and could drive the onset of coral disease

During environmental stress, many putative opportunistic and pathogenic taxa increase in abundance, such as members of the Vibrionaceae, Roseobacteraceae, and Rhodobacteraceae, due to the immune-compromised state of the host (Cardenas et al. 2012, Ziegler et al. 2016, Pollock et al. 2017, Certner and Vollmer 2018). It is noteworthy to point out that generalizations about genera or families being beneficial or harmful to corals should be avoided as interspecies interactions rely on a highly specific sets of genes that enable a bacterium to behave one way or another. As pointed out below, some families of bacteria contain species that are both beneficial and harmful to corals. Across coral species, during dysbiosis, specific bacteria have been shown to increase in abundance and activity; concomitantly, larger changes in the coral microbiome that involves one or more groups of bacteria were also shown to change in abundance and some of these have direct repercussions on coral physiology. For example, during coral exposure to elevated temperatures, diazotrophic bacteria were shown to increase in abundance (Santos et al. 2014, Lesser et al. 2018, Mohamed, personal communication) [for reviews see Radecker et al. (2015), Benavides et al. (2017)], which has a direct effect on nitrogen availability. More recent data show that despite an increase in nitrogen fixation that is correlated with an increase in diazotrophs during heat stress, fixed nitrogen is not assimilated by either the coral tissue or the algal symbionts (Radecker et al. 2022). Below examples of specific parasitic and opportunistic bacteria that have been reported are discussed.

Forty coral diseases have thus far been described (Sweet et al. 2012, Bruckner 2015); however, only few coral pathogens have been described (Pollock et al. 2011) [for a list of putative causative agents of coral disease, see Mohamed and Sweet (2019)]. Among proposed coral pathogens, *V. coralliilyticus* (Fig. 2) is the most well-characterized with direct implication in the onset of both coral bleaching and the infectious disease white syndrome (Ben-Haim et al. 2003, Pollock et al. 2011, Ushijima et al. 2014). Several other *Vibrio* species, such as *V. harveyi*, *V. owensii*, and *V. alginolyticus* (Fig. 2), have also been implicated in white syndrome (Luna et al. 2010, Ushijima et al. 2012, Zhenyu et al. 2013) and *V. tubiashii* (Fig. 2) in white patch syndrome (Sere et al. 2015). *Pseudoalteromonas piratica* (Fig. 2) has also been implicated in white syn-

drome (Beurmann et al. 2017). Other bacteria have been proposed as causative agents of coral diseases. For example, white pox in *A. palmata* has been proposed to be caused by the enteric bacterium *Serratia marcescens* (Fig. 2) (Patterson et al. 2002). White plague type II in scleractinian corals has been proposed to be caused by *Aurantimonas corallicida* (Fig. 2), a relative of Rhizobiales (Denner et al. 2003), while *T. loyana* (Fig. 2) was proposed to cause a white plague-like disease (Thomposon et al. 2006). Black band disease was originally thought to be caused by the cyanobacteria *Pseudoscillatoria coralii* (Rasoulouniriana et al. 2009) and *Roseofilum reptotaenium* (Fig. 2) (Casamatta et al. 2012); however, further research described this disease as a lesion of a complex microbial consortium composed of cyanobacteria and other microbes, including the sulphate-reducing bacterium *Desulfovibrio* sp. (Fig. 2), and a diverse array of heterotrophic bacteria, archaea, fungi, and other microeukaryotes (Sato et al. 2016). Finally, *Candidatus Aquarickettsia rohweri* (Fig. 2) is suspected of being implicated in white syndrome type I. This putative parasitic bacterium possesses several tools to benefit from the coral host, including an antiporter to exchange host ATP for ADP, a type IV secretion system, and appears to be using host nutrients, particularly nitrogen (Klinges et al. 2020). Other causative agents and almost all molecular factors of disease remain obscure.

More recently, during the onset of grey-patch disease, a 'microbiome-to-pathobiome' shift occurs that favours multiple specific pathogens that may be involved in degrading coral tissues (Sweet et al. 2019). This shift is hypothesized to be caused by bacterial quorum sensing molecules, such as homoserine lactones (Certner and Vollmer 2015). Homoserine lactones are small molecules produced by many bacteria to regulate their gene expression based on population density. Genes related to pathogenesis in bacteria, e.g. biofilm formation, siderophore production, toxin secretion, are typically regulated by quorum sensing (De Kievit and Iglewski 2000, Winzer and Williams 2001, Visca et al. 2007). Disease symptoms were induced in healthy *A. cervicornis* colonies exposed to bacteria supplemented with exogenous homoserine lactones, which correlated with a 'healthy' to 'disease-causing' microbiome switch and leading to white band disease-like symptoms. Indeed, microbial consortia isolated from white band disease-infected colonies and treated with homoserine lactone inhibitors lost their ability to develop the disease (Creter and Vollmer 2018). These observations suggest that quorum sensing can modulate bacterial regulatory networks that then reshape the microbial community during disease onset, though the mechanism of how this occurs is still unclear.

### Leveraging the coral microbiome to boost resilience of the holobiont

Inoculation of corals with probiotic microbes has been proposed to protect corals from the harmful impact of oil spills. This bioremediation approach was successful in mitigating the impacts of pollution and improved the health of affected corals (Fragoso Ados Santos et al. 2015). Several approaches have been proposed to aid corals in increasing their fitness, such as experimental evolution in coral photosymbionts (van Oppen et al. 2015, 2017) and bacterial probiotics application (Peixoto et al. 2017).

### Introducing heat-tolerant Symbiodiniaceae into corals

It is widely accepted that coral thermal tolerance is largely dependent on the physiology of their associated Symbiodiniaceae partners (Berkelmans and van Oppen 2006). *In-vitro* exposure of Symbiodiniaceae cultures to elevated temperatures increases their

thermal tolerance after ~40 generations (Chakravarti et al. 2017, Chakravarti and van Oppen 2018). Despite this acclimation, reintroducing heat-tolerant strains into corals yielded no significant benefit for the holobiont (Chakravarti et al. 2017). In contrast, a small minority of heat-tolerant Symbiodiniaceae strains derived from the same wild-type clone increased the thermal tolerance of coral larvae (Buerger et al. 2020). A mechanistic understanding of how heat tolerance in Symbiodiniaceae occurs and how in turn it influences the coral holobiont is needed to improve the efficacy of this approach.

### Using probiotics to help increase corals' resilience to climate change

Bacterial symbionts of corals represent an opportunity to increase the resilience of the coral in response to ocean warming (Zielger et al. 2019, Voolstra and Zielger 2020, Voolstra et al. 2021a). Coral microbiomes, especially those inhabiting the coral SML, are thought to rapidly respond to the surrounding environment and may contribute to the resilience and health of the holobiont (Bang et al. 2018, Ziegler et al. 2017, 2019). Recent efforts have been focusing on coral 'probiotics' applications to boost adaptation to climate change (Peixoto et al. 2017). This approach involves isolation and screening of native bacterial associates of corals for functions beneficial to coral health, and subsequently carry out physiological assays to determine holobiont performance after inoculation with these putatively beneficial microorganisms for corals (BMCs) (Rosado et al. 2019). Experimental manipulation using mixed consortia of native coral bacterial isolates harbouring beneficial genes such as nitrogen fixation (*nifH*) and DMSP-degradation (*dmdA*) genes (Fig. 3) resulted in partial mitigation of coral bleaching compared to controls or corals challenged with the pathogen *V. coralliilyticus* (Rosado et al. 2019). Mesocosm experiments coupled with multiomics revealed an increase in coral resilience following probiotic application and was followed by a reprogramming of coral transcriptional machinery to activate the immune system and stress pathways during the recovery period (Santoro et al. 2021). Despite the successful applications described so far, most marine bacteria remain uncultivable (Lok 2015, Hofer 2018, Jiao et al. 2021) and even with cultured ones, our knowledge of their benefit to the coral is limited. As our understanding of the role bacterial symbionts play expands, e.g. through the use of culturomics (Schultz et al. 2022), more targeted engineering of beneficial microbial communities may be valuable in supporting recovery of coral reefs.

Another approach inspired by fecal microbiota transplantation in humans, called field-based coral microbiome transplantation (CMT) (Doering et al. 2021), has successfully shown the feasibility of microbiome transplantation of homogenized coral tissues from healthy colonies to bleached colonies to increase coral heat tolerance. This approach has many advantages as it circumvents ethical issues associated with introducing new bacterial isolates into the environment, avoids the daunting task of screening bacterial function in the laboratory, and enables the transmission of the large uncultivable fraction of the microbiome. In both probiotic and CMT approaches, the mechanisms underlying the microbiome–host interaction and stress tolerance are yet to be established.

### Understanding host–pathogen interactions in the coral–*Vibrio* system

It is now widely accepted that many coral diseases are caused by a diverse polymicrobial consortium [Roder et al. 2014, Sweet et al. 2019, for a review see (Mohamed and Sweet 2019)] though

the mechanisms underlying these infections are largely unknown. During responses to environmental stressors, the microbiome of the reef undergoes shifts towards an increasing microbial diversity (Haas et al. 2016). During this reef microbialization, the coral decline is attributed to the preferential increased abundance of pathogens and their virulence factors. Although most infection experiments examine coral pathogens separately, simultaneous inoculation of *V. coralliilyticus* and *V. mediterranei* in the coral *Oculina patagonica* leads to increased virulence and higher coral tissue damage, suggesting the cumulative effect of both bacteria accelerate pathogenicity (Rubio-Portillo et al. 2014). Recently, Rubio-Portillo et al. (2020) attempted to understand the mechanisms underpinning the interaction between these pathogens and their interaction with corals during infection. When co-cultured together, these bacteria overexpress genes related to virulence factors, such as siderophores, type VI secretion system, and toxins (Fig. 3). These transcriptional responses towards a related competing species suggest these pathogens may favour the colonization of the host when they are present in a mixed population. Moreover, during coral exposure to a coculture of *V. coralliilyticus* and *V. mediterranei*, virulence factors (product of interspecies competition between the two coral pathogens) led to shifts in the coral microbiome favouring specific opportunistic groups. These in turn caused increased production of Lyso-PAFs (Fig. 3) by the coral to fight the pathogens back, which led to increased production of ROS and tissue necrosis (Rubio-Portillo et al. 2020).

### Coral–microbiome crosstalk from recognition to gene regulation

Little is known about the mechanisms of coral–microbiome interactions mainly because of the lack of a genetically tractable coral model system that can be manipulated in the laboratory, the lack of cultivable strains of certain coral microbial symbionts (e.g. some bacteria, certain Symbiodiniaceae strains, and cryptic species) and their genomic resources. All these aspects hinder our understanding of the gene regulatory circuits within members of the coral holobiont. Other symbiotic systems, such as human–microbiome interactions, provide an opportunity to learn more about coral holobiont interactions. In this section, identified recognition mechanisms that corals use to interact with its microbiome, the potential for the coral microbiome to produce epigenome-effector proteins, delivery of such microbially derived signals to the coral host, and mechanisms that enable coral–microbiome interactions with a focus on noncoding RNAs (ncRNAs), akin to human–microbiome interactions, are discussed.

### Recognition mechanisms in coral–microbiome interactions

Strong evidence supports the key roles of the host innate immune system in all aspects of the symbiotic association, from recognition, maintenance, and collapse (dysbiosis) (Weis 2008). Recognition is the first step that enables corals to determine whether a microbe is beneficial or not. Microbial cell membranes (cell walls in the case of Symbiodiniaceae) are decorated with a variety of microbial-associated molecular patterns (MAMPs), including glycans, that are recognized by the coral host via the pattern recognition receptors (PRRs) on phagocyte cell surfaces (Weis 2008). A wide variety of PRRs has been recognized in cnidarians, including toll-like receptors (TLRs), the intracellular pattern recognition receptor nucleotide-binding oligomerization domain 2 (NOD2), complement and its receptor (CRs), scavenger receptors (SRs), and lectins (Fig. 4) (Weis 2008, Davy et al. 2012, Weis 2019). These PRRs can be activated to detect beneficial microbes, e.g. the detection



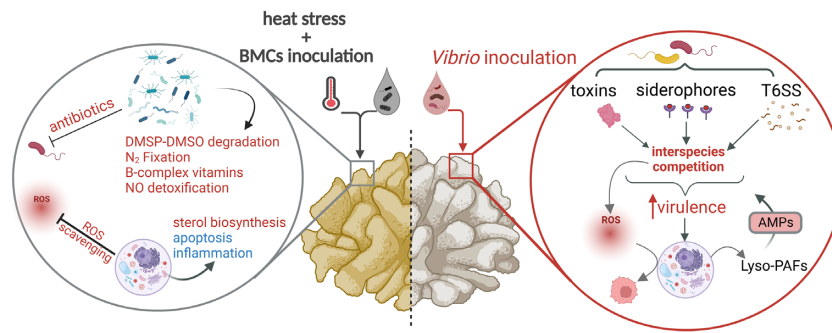

**Figure 3.** Depiction of the influence of BMCs to reduce mortality after heat stress (left) and pathogenic bacteria of the genus *Vibrio* on the coral host (right). Coral cells are depicted as the eukaryotic cell at the bottom of each side of the figure, while the microbiome or *Vibrio* are depicted by bacterial cells on the top. Function names in red font indicate an increase, while those in blue font indicate a decrease. After being exposed to heat stress and inoculated with BMCs, the coral host increases sterol biosynthesis while decreasing apoptosis and inflammation. BMCs support the coral host via N<sub>2</sub> fixation, DMSP–DMSO degradation, ROS scavenging, proteins related to B-complex vitamins, nitric oxide detoxification, and production of antibiotics. *Vibrio* competes with members of the coral microbiome via production of type VI secretion system (T6SS) proteins, toxins, and siderophores. These interspecies competition mechanisms increase virulence factors that may confer an advantage to these pathogens over resident taxa and induce changes in the coral holobiont. Corals exposed to vibrios show high levels of platelet-activating factors (such as Lyso-PAFs) as a defence mechanism as they have antimicrobial properties. DMSP; dimethylsulfoniopropionate, DMSO; dimethyl sulfoxide, Lyso-PAFs; platelet-activating factors, and AMPs; antimicrobial peptides.

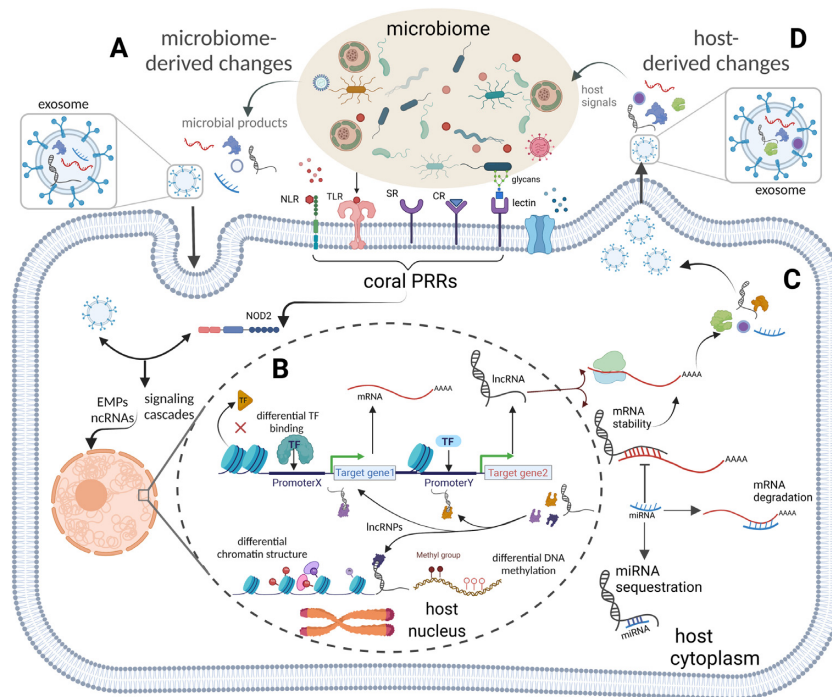

**Figure 4.** Potential mechanisms underlying host–microbiota crosstalk in corals. Coral-associated microbes can alter the host gene expression by modifying the host epigenome. The coral host recognizes microbes (lectin–glycan interaction) and their products through interaction with extracellular receptors or through exosome-based delivery of microbiome-derived molecules. (A) These microbial-derived signals may cause specific changes in the host nucleus directly via epigenome-modifying proteins or indirectly through NOD2 signalling, following binding of various pattern recognition receptors to microbial signals (e.g. metabolites). (B) This leads to changes in host gene expression through epigenetic mechanisms, such as changing chromatin accessibility and DNA methylation that will lead to differential transcription factors binding, altered expression of certain genes, transcription factors, and ncRNAs such as long noncoding RNAs (lncRNAs). lncRNAs can further regulate gene activity at the epigenetic, transcriptional, or post-transcriptional levels. (C). The interaction is bidirectional as host-derived signals (proteins, ncRNAs, or metabolites) may be delivered to the coral microbiome (D) leading to differential microbial growth. NLR: NOD-like receptor, lncRNP: lncRNA–protein complex, and miRNA: microRNA.

of Symbiodiniaceae by lectins (Mohamed et al. 2016), while being suppressed during encounters with parasites presumably as a host evasion mechanism (Mohamed et al. 2018). These MAMP–PRR interactions in corals include: lectin–glycan interactions (Wood-Charlson et al. 2006, Bay et al. 2011, Parkinson et al. 2018), scavenger receptors (Neubauer et al. 2016), thrombospondin type 1 repeat proteins (Wolfowicz et al. 2016, Neubauer et al. 2017, Mo-

hamed et al. 2020b), glycoprotein2 (GP2) (Mohamed et al. 2016, 2020b), toll-like/nucleotide oligomerization domain (NOD)-like receptors (TLRs/NLRs) (Hamada et al. 2013, Weiss et al. 2013, Mohamed et al. 2020b), and complement systems (Poole et al. 2016) (Fig. 4).

Once PRRs are activated in the case of Symbiodiniaceae, the host facilitates the persistence and proliferation of symbionts

inside symbiosomes via suppression of its immune response and arrest of phagosomal maturation (Davy et al. 2012, Mohamed et al. 2016, 2020b). In contrast, immune response and phagosomal maturation are activated to reject and clear the symbionts out during dysbiosis and bleaching (Downs et al. 2009) and during encounters with parasites (Mohamed et al. 2018). Activation of MAMP–PRR interactions leads to downstream innate immune signalling cascades and production of effector proteins (Fig. 4) such as tolerogenic TGF $\beta$  pathway (Detournay et al. 2012, Bertheliet et al. 2017), sphingolipid signalling (Kitchen and Weis 2017, Kitchen et al. 2017), and the master immunity regulator NF $\kappa$ B (Mansfield et al. 2017, Jacobovitz et al. 2021). These interactions are well supported in corals and sea anemone by many ‘omics studies that implicate innate immune genes (Shinzato et al. 2011, Mohamed et al. 2016, 2020b, Cunning et al. 2017, Jacobovitz et al. 2021).

### Microbially derived host epigenome-effector proteins

Many bacteria, including the pathogens *Helicobacter pylori* and *V. cholerae* deliver effector proteins into a wide range of host cells, including humans, plants, and invertebrates using type IV or VI secretion systems to interfere with host signalling pathways (Green and Meccas 2016). Not surprisingly, secretion systems have been highlighted as putative mediators of symbiotic associations (Coombes 2009). Interestingly, several secretion systems, including type IV, have been identified in the microbiomes of several coral species (Weber et al. 2019). These secretion systems can be used to deliver effector proteins from the associated microbiomes to the host or other members of the holobiont. Moreover, living cells can send and receive packages of information that are enclosed by cell membranes in the form of extracellular vesicles (EVs) such as exosomes (Fig. 4). EVs are lipid bilayer nanoparticles that act as key messengers in cell-to-cell communication and can be produced by unicellular microbes and multicellular metazoans alike. EVs contain diverse molecules, including effector proteins, such as microbes-derived epigenetic-modifying proteins (Yang et al. 2022). Once delivered to the host, these epigenetic-modifying proteins target the host cell nucleus to affect host responses through epigenetic mechanisms. These epigenetic modulations are hypothesized to directly or indirectly influence phenotypic responses in the host (Barno et al. 2021, Morovic and Budinoff 2021). Barno et al. searched for putative homologs of known epigenome-modifying proteins from other host model systems in 18 bacterial genomes and 52 prokaryotic MAGs associated with two coral species. They identified homologs of the histone modification proteins ankyrin-repeat protein A and internalin B, a histone methyltransferase, and several DNA methyltransferases, suggesting that the coral microbiome has the machinery to modify the host epigenome (Barno et al. 2021).

### Molecular mechanisms of host–microbiota crosstalk in corals

The mechanisms enabling the microbiome to influence genetic and physiological responses of the coral host are lacking. Many studies in model organisms, including humans, show an association between the microbiome and host gene expression. However, it is unclear what the direction of causality is with these associations. Disentangling this relationship is crucial for understanding homeostasis of normal symbiosis and dysbiosis, leading to disease etiology (Nichols and Davenport 2021). Upon delivery of microbiome-derived signals, many signalling cascades are likely activated to influence the host epigenome, which ultimately reprograms the host transcriptional machinery towards specific host phenotypes (Fig. 4).

### Transcription factor-mediated gene regulation

Gene regulation is usually mediated through transcription factors (TFs) that can link host gene expression and its microbiome (Fig. 4). Host TFs bind to specific DNA motifs (regulatory elements such as promoters and enhancers) to control the transcription of certain genes. Previous research on zebrafish demonstrated interactions between the TF HNF4A and the microbiome promote gene expression patterns associated with inflammatory diseases (Davison et al. 2017). In mice, microbiota colonization of intestinal epithelial cells leads to drastic genome-wide reduction of the HNF4A occupancy, a measure of TF binding to its DNA motif (Davison et al. 2017), suggesting that the microbiota negatively regulate HNF4A. This indicates a conserved role for HNF4A in maintaining homeostasis of the intestine in response to the microbiome. Similarly, in Metazoa, the master regulator of innate immunity, NF- $\kappa$ B (Gilmore and Wolenski 2012) has been implicated during both the onset and breakdown of the coral–Symbiodiniaceae symbiosis. NF- $\kappa$ B activation leads to the upregulation of various effector pathways that drive an innate immune response. Numerous MAMP–PRR interactions that trigger the activation of NF- $\kappa$ B have been a recent focus in cnidarian genomic studies (Poole and Weis 2014, Baumgarten et al. 2015, Williams et al. 2018). The presence of Symbiodiniaceae in *Aiptasia* triggers a strong suppression of the host immune response (Perez and Weis 2006, Detournay and Weis 2011), but the exact mechanism is still unclear. Inoculation experiments in *Aiptasia* suggest that NF- $\kappa$ B is playing a role in this immune suppression, as the addition of symbionts leads to decreases in NF- $\kappa$ B expression in aposymbiotic larvae inoculated with mutualistic Symbiodiniaceae (Wolfowicz et al. 2016, Mansfield et al. 2017). Inversely, NF- $\kappa$ B expression increases during bleaching in adults (Mansfield et al. 2017). These results suggest that during symbiosis establishment, the algal symbionts modulate the host immune response by repressing the expression of NF- $\kappa$ B to enable colonization of the host. However, the link between NF- $\kappa$ B and coral-associated bacteria has not been established yet.

### Epigenetic modifications

Other mechanisms of gene regulation include epigenetic modifications that can influence gene activity, including DNA methylation (addition of methyl groups at specific genomic CpG loci) and histone acetylation (addition of acetyl groups at specific histone sites). Epigenetics is a rapidly growing field and of great interest in the context of ‘environmental memory’ (Eirin-Lopez and Putnam 2019) that may explain phenotypic plasticity and acclimatization (Torda et al. 2017, Liew et al. 2018).

The host epigenetic profiles are thought to be influenced by its microbiome (Yu et al. 2015, Krautkramer et al. 2017, Miro-Blanch and Yanes 2019). In mice, germ-free animals have lower DNA methylation levels across the genome in the colon cells compared to animals with microbiomes (Yu et al. 2015). Fecal transplants also increase global DNA methylation in germ-free mice (Krautkramer et al. 2017). The microbiome can additionally remodel host responses at the chromatin level (Fig. 4) in intestinal epithelial cells. Profiling chromatin states via ATAC-seq in human colonic epithelial cell culture demonstrated that specific microbes regulate genome-wide accessibility of chromatin and TF binding in the host tissues (Richards et al. 2019). In mice, the presence of the microbiome results in increased levels of chromatin accessibility in intestinal epithelial cells compared to a gnotobiotic mouse (Semenkovich et al. 2016). These microbiome-induced changes to host epigenomes play a major role in various aspects

of health and metabolic disease, including responding to diet, inflammation, obesity, and diabetes [for a review see Sharma et al. (2020)]. However, this microbiome–host epigenome relationship has not been examined in corals yet. Research should be focusing on establishing the link between the coral-associated microbes and the host epigenetic profiles.

While changes in the coral epigenome or microbiome is mostly correlated to environmental stressors (Putnam and Gates 2015, Roder et al. 2015, Dixon et al. 2018, Liew et al. 2018, Ziegler et al. 2019, Tong et al. 2020), similar interaction patterns between the microbiome and the coral epigenome are expected, despite the current lack of such information. Interestingly, a recent shotgun metagenomic study has hypothesized a possible chromatin interaction between corals and their associated microbiomes. MAGs derived from healthy colonies of the coral *P. lutea* were shown to be enriched in genes encoding ankyrin repeat proteins (Robbins et al. 2019). One such protein, AnkA, presumably disrupts host antimicrobial responses against its producer, the intracellular pathogenic bacterium *Anaplasma phagocytophilum* (Garcia-Garcia et al. 2009). AnkA is hypothesized to translocate into the host cell nucleus and bind to regulatory regions of the host chromatin, silencing key host defence genes involved in ROS production. These patterns suggest intracellular pathogens may directly regulate host gene expression by changing host chromatin structure. Similarly, pathogens like *V. coralliilyticus* may be able to modify host responses using similar mechanisms. Intracellular mutualistic bacteria may also use these mechanisms to suppress the host immune response to establish a symbiotic relationship.

### ncRNAs as mediators of immune priming and potential communication signals

RNA molecules constitute a common ancient language encoded in all living organisms across all domains of life. Genome-wide transcription in all living cells is responsible for producing two main classes of RNA molecules: coding RNAs (<2%) and ncRNAs comprised of RNA molecules with reduced coding potential that have instead regulatory functions (Hangauer et al. 2013). Among the different classes of ncRNAs, lncRNAs share structural similarities with mRNAs such as polyadenylation at the 3' ends and the cap structure at the 5' ends [for a recent review see Statello et al. (2021)]. Mechanisms of lncRNA-mediated gene regulation can happen at the epigenetic (by recruiting or sequestering epigenetic modifiers), transcriptional (forming triple helical structures with DNA via Hoogsteen base pairing), and post-transcriptional (forming duplexes such as lncRNA–mRNA or lncRNA–miRNA duplexes) levels. (Fig. 4). At the molecular level, lncRNAs can sequester or recruit epigenetic modifying proteins, such as DNA methyltransferase and chromatin-remodelling complexes (Yu et al. 2017, Canzio et al. 2019, Liu et al. 2019). They can also stabilize their target transcripts (Geisler and Coller 2013) to increase mRNA expression (Ebert and Sharp 2010) and sequester proteins by forming lncRNA–protein complexes that alter mRNA splicing (Peng et al. 2020) (Fig. 4).

lncRNAs have been proposed as putative regulators of diverse biological processes, including immune responses during host–pathogen interactions in mammals [for a review see Agliano et al. (2019)]. They are also implicated in developing innate immune memory ‘priming’ (Zhang and Cao 2019) in invertebrates (Gourbal et al. 2018). In sea anemone, pre-exposure to a sublethal pathogen dose enhances short-term survival upon subsequent lethal exposures (Brown and Rodriguez-Lanetty 2015).

Despite the availability of several reference genomes for corals, the mechanistic and genomic basis for immune priming in corals

is currently completely unknown. In the context of the coral holobiont, more work is urgently needed in order to understand the functions of lncRNA regulatory networks. The role of ncRNAs in coral holobiont homeostasis is readily teased out from available transcriptomic data, demonstrating the fluctuations in the holobiont transcriptional output during disease progression, bleaching (Libro et al. 2013, Daniels et al. 2015, Pinzon et al. 2015), or host–pathogen/parasite interactions (Burge et al. 2013, Mohamed et al. 2018, van de Water et al. 2018). Preliminary data support the idea that ncRNAs act as mediators of both biotic or abiotic stress responses and symbiosis establishment. Early evidence of the presence of functional ncRNAs in corals was obtained from small RNA-seq experiments performed in *Stylophora pistillata* (Liew et al. 2014), where five microRNAs (miRNAs) among 50 were conserved in other metazoans. Other families of ncRNAs, such as lncRNAs, have also been recently described as putative players in coral responses to microbiome imbalance. In *Palythoa caribaeorum*, transcriptome analysis detected >10 000 expressed lncRNAs, some of which were conserved in higher eukaryotes (Huang et al. 2017). Investigation of differentially expressed lncRNAs in healthy colonies compared to bleached colonies indicated that upregulated lncRNAs in *P. caribaeorum* could act as post-transcriptional modulators of the Ras-mediated signal transduction pathway and components of the innate immune system, as part of the molecular response of corals to bleaching (Huang et al. 2017). ncRNAs have also been implicated in the establishment of endosymbiosis in cnidarians, e.g. miRNAs in the sea anemone *Aiptasia* (Baumgarten et al. 2018) and lncRNAs in the coral *A. digitifera* (Mohamed et al. 2016, Huang et al. 2019). Using high-throughput sequencing cross-linking immunoprecipitation (HITS-CLIP), miRNAs were found to be differentially expressed and subsequently targeted genes implicated in Symbiodiniaceae colonization (e.g. FGFR, TGF $\beta$ R, and components of the TNFR/TRAF pathways, arrest of phagosomal maturation, and sterol/peptide transporters) in response to endosymbiont infection (Baumgarten et al. 2018). Twenty-one out of 815 lncRNAs were differentially expressed 4 h post-colonization of algal symbionts (Huang et al. 2017) for which gene co-expression networks identified 6395 coral transcripts potentially regulated. Many of these transcripts were involved in the early stages of coral–algal interactions. Cumulatively, these studies provide preliminary evidence that ncRNAs modulate specific pathways related to symbiosis onset and breakdown of the cnidarian–Symbiodiniaceae relationship.

The transfer of communication signals (ncRNA, proteins, metabolites) between cells via exosomes (Fig. 4) was first observed in mouse and human cells (Valadi et al. 2007). Functional transfer of ncRNAs among tissues of the same organism was demonstrated in animal models, where exosome-mediated transfer of miRNA from adipose tissue were released and transported through circulating fluids to their final target distant tissues (Thomou et al. 2017). Exosomes may be microbiota-derived to deliver microbial signals that can control diverse pathways in the host (Ahmadi Badi et al. 2017). Our current understanding of ncRNAs sorting and processing via exosomes stems from miRNAs in human and mammalian systems (Kogure et al. 2019, Lee et al. 2019). However, the mechanisms of ncRNAs processing are not well understood in nonmodel species such as cnidarians and bacteria. ncRNAs are promising communication signals within the holobiont due to their common mechanisms of action among different compartments of the holobiont. The regulatory roles of molecules like miRNAs in eukaryotes and sRNAs in prokaryotes have been previously established (Blenkiron et al. 2016, Viennois et al. 2019).

On the other hand, the regulatory roles of other ncRNAs such as lncRNAs within holobiont context are still unknown.

## Integrated host–microbiota multiomics to understand holobiont biology

Over the past decades, technical and computational advances have allowed the collective use of ‘omics tools to better understand different aspects of host–microbiome systems. In corals, however, most of these ‘omics tools have been used separately to understand a particular molecular level at a time. In this section, we describe the recent omics tools used in the field that shape our understanding of the coral microbiome and discuss the need for integrated coral–microbiota multiomics data to unravel the different layers of the coral microbiota interplay.

### Characterizing the structure and functional potential of the coral microbiome

Recent advances in coral holobiont research have been possible due to the rise of ‘omics techniques, particularly genomics (Cooke et al. 2019, Jasper et al. 2019, Engelberts et al. 2021). Among the most widely used methods to characterize the diversity of coral microbiomes and understand their role in light of climate change is amplicon sequencing studies (Fig. 5). Most of these efforts focus on examining the diversity of coral-associated microbes using sequencing amplified variable regions of marker genes such as the 16S rRNA gene for prokaryotes or internal transcribed spacer 2 (ITS2) and the 18S rRNA gene for eukaryotes like Symbiodiniaceae and fungi. Amplicon sequencing is affordable, enabling the incorporation of large sample numbers; however, classification of prokaryotes using 16S rRNA amplicons is limited mostly to the family or genus level while species-/strain-level classification is mostly not attainable (Johnson et al. 2019). Shallow whole-metagenome shotgun sequencing has been proposed as a cost-effective tool to study microbial diversity at higher accuracy compared to amplicon sequencing (Xu et al. 2021a). Even when species-level classification is possible using the full-length 16S rRNA gene (Matsuo et al. 2021), connecting such species to functional potential is difficult (Jasper et al. 2019). Inherent biases in PCR that are used in amplicon sequencing is another limitation (Aird et al. 2011). A workaround uses phylogenetic investigation of communities by reconstruction of unobserved states (PICRUSt, PICRUSt2) (Langille et al. 2013, Douglas et al. 2020) and Tax4fun (Aßhauer et al. 2015, Wemheuer et al. 2020), which enable prediction of gene function from 16S rRNA gene information based on publicly available reference genomes (Ainsworth et al. 2015, Röthig et al. 2016, Ziegler et al. 2017, Hernandez-Agreda et al. 2018). While this is a useful approach for well-studied and sequenced microbes, prediction of function for microbes with unresolved phylogeny, cryptic microbes, and microeukaryotes is largely limited (Sun et al. 2020). In addition, genomic islands and plasmids in bacteria that are often horizontally transferred among bacteria and typically contain antibiotic resistance genes and other genes for rapid responses to environmental change are not resolved using PICRUSt (Sun et al. 2020).

A handful of studies examined the coral microbiome using metagenomics and the subsequent acquisition of MAGs to study the functional potential of coral-associated microbes (Cai et al. 2017, Meyer et al. 2017, Robbins et al. 2019, Keller-Costa et al. 2021, Wada et al. 2022). Shotgun metagenomics enables the characterization of the diversity and functional potential of microbial communities, including the coral host with less bias than PCR-based amplicon sequencing. The assembly of MAGs enables direct ex-

amination of the role specific microbes may play in the holobiont. Metagenomics data can also integrate with other ‘omics techniques (discussed below) to provide a more holistic understanding of the holobiont. Despite these advantages, shotgun metagenomic data still suffers from some limitations. Shotgun metagenomics is significantly more expensive, though the cost is constantly decreasing, and computationally more demanding than amplicon sequencing. Due to the larger genomes and biomass of the coral host and Symbiodiniaceae cells compared to other microbial cells, shotgun metagenomics produces mostly coral and symbiont reads, with microbial reads becoming a small fraction of the total output. While *in-silico* separation of these microbial reads from other reads is possible, it is technically challenging and requires sequencing to high depths, especially when lacking reference genomes for the coral and Symbiodiniaceae. Physical size fractionation to enrich prokaryotic cells and DNA has been successfully applied in selected reef species, albeit with limitations (Littman et al. 2011, Robbins et al. 2019). Nonetheless, more metagenomic sequencing is urgently needed to advance our understanding of what coral symbionts contribute to the host and the role of cryptic microbes in this relationship.

### Metatranscriptome profiling to study holobiont transcriptional responses

The availability of draft genomes for several coral species paved the way to a wave of coral transcriptome-wide sequencing studies (Fig. 5). RNA-seq is the most widely used among the ‘omics methods to understand coral responses during exposure to disease (Libro et al. 2013, Wright et al. 2015, Anderson et al. 2016, Frazier et al. 2017), establishment of coral–algal symbiosis (Mohamed et al. 2016, Yuyama et al. 2018, Mohamed et al. 2020b, Yoshioka et al. 2021), adaptation to the deep sea environment (Yum et al. 2017), responses to natural bleaching (Pinzon et al. 2015, Rose et al. 2015, Seneca and Palumbi 2015), and heat stress (Savary et al. 2021, Voolstra et al. 2021b). In addition to characterizing the transcriptional responses of coral hosts via mRNA differential analysis, metatranscriptomics has been scarcely utilized in corals to study the transcriptional responses of the microbiome primarily because of the need to overcome the relatively high abundance of host RNA relative to the microbiome. Studies that utilized metatranscriptomics have discovered new patterns in the holobiont. For example, Daniels et al. (2015) identified shared and distinct transcriptional responses to disease among different holobiont compartments, where innate immunity, cytoskeletal integrity, cell adhesion, and oxidative stress characterized the coral response, heat shock proteins, genes related to oxidative stress, and DNA repair characterized the bacterial response, and photosynthesis, and metal transport characterized the algal symbiont’s response. These results highlight a functional integration across the holobiont in response to disease. Metatranscriptome data from three different coral species identified host and algal symbiont genes that exhibited different changes in gene expression in a lineage-specific way (among the Robust and Complex coral clades) and showed higher bacterial diversity, bacterial metabolic capabilities, and transcriptional activity in the thermo-tolerant to -susceptible species suggesting potential roles for the bacterial microbiome in supplementing the metabolic needs of the holobiont during heat stress (Avila-Magaña et al. 2021). Metatranscriptomic data have also been generated from *in-hospite* Symbiodiniaceae in both adult and larval stages (Bellantuono et al. 2019, Maor-Landaw et al. 2020, Mohamed et al. 2020b) highlighted a generalized transcriptome-wide suppression that includes photosynthesis and protein synthesis during symbiosis onset.

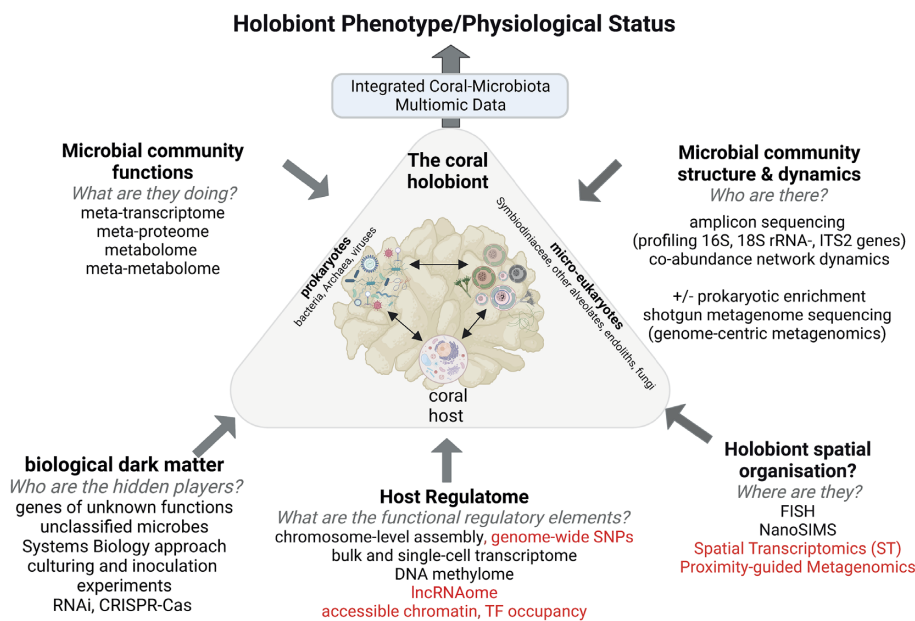

**Figure 5.** The different omics approaches deployed for studying the coral holobiont. An integrated coral-microbiota multiomics approach is needed to fully understand the biology of the coral holobiont. New approaches yet to be explored are highlighted in red.

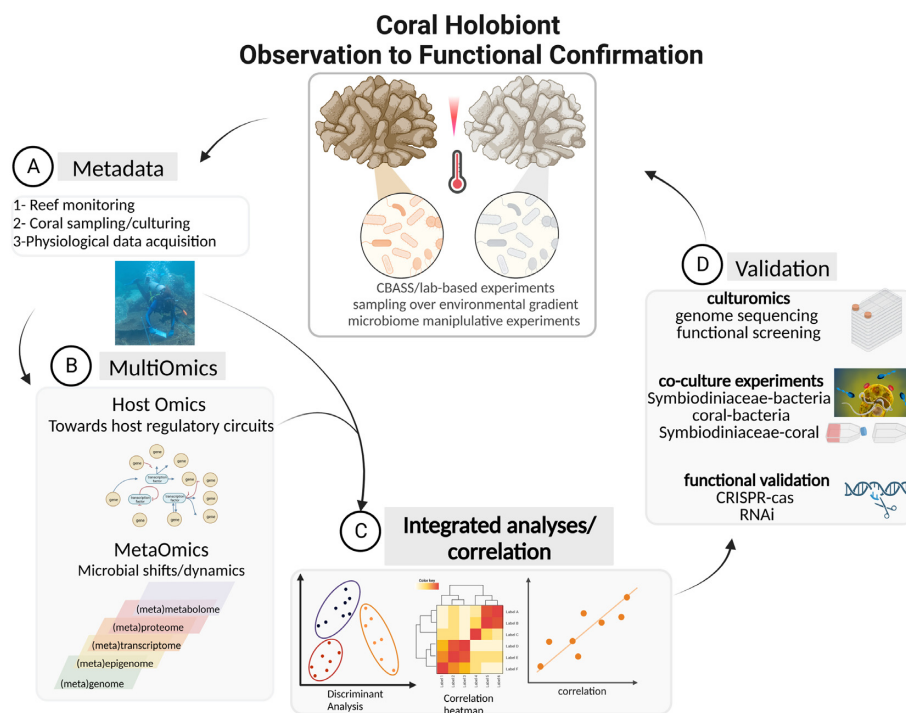

**Figure 6.** Strategies for conducting experiments aimed at understanding coral holobiont functions. The collection of multiomics data representing both the coral (host omics) and its microbiome (metaomics). The integrated multiomics analyses need to be paired with accurate metadata measurements for correlations. Hypotheses drawn from the integrated multiomics data should be tested by further validation experiments.

**Coupling gene co-expression networks with identifying key regulators in metatranscriptomics**

Gene networks have been recently utilized to identify gene expression patterns in corals using weighted gene coexpression network analysis (WGCNA), that quantifies the co-expression patterns among DE genes, to identify clusters of highly correlated genes (gene modules) (Langfelder and Horvath 2008). These efforts have mainly focused on coral gene expression data to iden-

tify expression modules or ‘clusters of co-expressed genes’ (Rose et al. 2015). Indeed, WGCNA-inferred gene networks revealed a potential adaptive mechanism named ‘transcriptional frontloading’, which means the constitutive higher baseline of expression levels of stress response genes in well-adapted ‘stress resilient’ corals compared to less-adapted ‘stress susceptible’ counterparts (Brashis et al. 2013). WGCNA analyses were implemented to study the response to experimental heat stress of *A. hyacinthus* colonies

that had been transplanted between two differing reef environments (Rose et al. 2015, Bay and Palumbi 2017). These experiments identified modules of coexpressed genes where some of which correlated strongly with the bleaching responses of individual colonies, hence called 'bleaching modules'. These genes were proposed as potential biomarkers for predicting coral survival under environmental stress. However, the applied WGCNA approach is best for identifying expression modules but has not been used to pinpoint to master regulators that could control the transcriptome remodelling due to a given perturbation.

Other information can be readily extracted from coral transcriptomes beyond differentially expressed genes, such as the regulatory potential of TFs and ncRNAs including lncRNAs. Despite the availability of the needed coral transcriptomic data, these analyses are not widely performed in the coral field. Amongst other promising network approaches, the Partial Correlation and Information Theory (PCIT) algorithm (Reverter and Chan 2008) aims at identifying key regulatory factors within the gene network by applying PCIT combines partial correlation coefficients with information theory to explore all the correlations between possible triplets of genes within the dataset prior to the identification of significant correlations. This approach has been coupled with the concept of differential networks (the difference in connections per node from one network to another) (Ideker and Krogan 2012, Hu et al. 2016) to understand various traits in other species and identify master regulators (Cánovas et al. 2014, Wouters et al. 2020, Botwright et al. 2021, Mohamed et al. 2022). Master regulators undergo substantial changes in connectivity to genes during the transition between physiological states so that differential connectivity may identify highly differentially connected genes between the networks (Hudson et al. 2012). These master regulatory genes within a network may act as key regulatory components of transcriptional networks that could be used further in functional assays (e.g. gene editing) to understand their functions beyond correlations. A shift from differential expression to differential networks in coral molecular studies would allow an understanding of the gene regulatory circuits underlying various traits in corals.

### Proteomics and metabolomics potential to uncover the metabolic activity of the holobiont

While metatranscriptomics alone has proven useful in the few examples it has been applied, integrating with other meta-'omics techniques can further confirm gene expression patterns, quantify their impact and shed light on new metabolic and symbiotic patterns. Particularly, mass-spectrometry based techniques, like proteomics and metabolomics (Fig. 5), are elucidating new discoveries in holobiont research. Proteomics was recently successfully used to distinguish between host and symbiont-related responses due to heat stress, showing downregulation of symbiosis signals in the host, and photosynthesis breakdown in the symbiont (Mayfield et al. 2021, McRae et al. 2021, Petrou et al. 2021). Proteomics also shed light on the potential role of bacterial symbionts, such as vitamin supply by *Endozoicomonas* to their host (Pogoreutz et al. 2022). New molecules such as the dipeptides lysine–glutamine and arginine–glutamine have been identified as molecular biomarkers for coral thermal stress (Williams et al. 2021a).

Although proteomic data correlates well with physiological data, there is a temporal delay in transcript-to-protein responses in most organisms that often renders proteomic data in apparent disagreement with transcriptomic data if this delay is not taken into consideration (Mayfield et al. 2018). However, proteomic

data are considered more representative of observed phenotypes, unlike transcriptomics where epigenomic regulation and post-translational modifications may skew transcriptome–phenotype comparisons (Manzoni et al. 2018). Therefore, proteomic studies need to become a larger component of coral studies.

Compared to other 'omics techniques, metabolomics (Fig. 5) has largely lagged due to major limitations in detection of low-abundance metabolites and the large number of cryptic metabolites that are often observed in biological systems (Vohsen et al. 2019). Therefore, most studies resolve to compare overall metabolic profiles at various conditions, while highlighting only putative identifications (Sogin et al. 2017, Hillyer et al. 2017a, Lohr et al. 2019). Several metabolomics studies have shed light on new mechanisms of interactions within the coral holobiont, such as increases in platelet activation factors at coral–algal interfaces (Quinn et al. 2016). The correlations of various lipid classes like betaine–lipids and diacyl–glycerides were able to indicate previous bleaching events of coral colonies (Roach et al. 2020), can be markers of diseases (Deutsch et al. 2021). Likewise, dipeptides were reported as indicators of heat stress (Williams et al. 2021a). By sampling coral colonies at different distances from the coral animal surface, dozens of metabolites and chemical features were found to form a gradient around coral colonies; these metabolites were composed of diverse chemical classes that may be important in structuring the SML microbiome (Ochsenkühn et al. 2018), such as the hormone estrogen (Vilela et al. 2021), which can restructure the microbiome in addition to controlling stress responses (Stien et al. 2020). *In-silico* analysis of mass shifts in holobiont mass spectrometry datasets, like the addition/subtraction of e.g. hydroxy (–OH) or methyl groups (–CH<sub>3</sub>), can be used to reveal genetic differences and even can be correlated to transcriptomic variances of closely related organisms (Hartmann et al. 2017). Beyond predicting metabolites, examination of elemental exchanges within the holobiont using stable-isotope labelling (e.g. <sup>13</sup>C, <sup>15</sup>N) of metabolites or nutrients has been useful in determining the role of diazotrophs in the holobiont as a source of nitrogen in a stable symbiotic state but disregards an oversupply of microbial derived N during heatstress (Rädecker et al. 2021). Isotope labelling of coral fragments in <sup>13</sup>C-bicarbonate enriched media of e.g. amino acids, fatty acids or lipogenesis intermediates confirmed under severe heat stress conditions decreases of *de novo* biosynthesis of fatty acids in the symbiont leads to a consequent decrease in fatty acids in the host (Hillyer et al. 2017b).

Despite its promises and relatively low cost compared to sequencing, metabolomics suffers from several limitations. The immense diversity of chemical formulae and resulting structures poses the biggest challenge in mass spectrometry-based metabolomics, where annotations can only be confirmed reliably with comparisons to known standards. Further, extraction protocols, e.g. differences in solvent mixtures, disruption techniques, or even cooling, have an influence on detected molecules as some metabolites are prone to degradation (Lu et al. 2020), while others are not efficiently extracted (Andersson et al. 2019), which calls for standardization. In the context of the holobiont, a major challenge is linking metabolites with their producing organism. Statistical correlation of metabolite and amplicon sequencing data enables linking of an organism with its metabolites (Jorissen et al. 2021); however, most central metabolites are shared across different organisms within the holobiont and so this approach only applies to unique secondary metabolites. Using metagenomic, metatranscriptomic, or proteomic data can enhance metabolomics significantly since enriched organisms/genes/proteins from a specific organism is often indicative of a corresponding increase in

metabolite abundance. For example, steroids depend on the presence of algal symbionts, which cnidarians are unable to produce. Therefore, the expulsion of symbionts during bleaching, consequently leads to a decrease of steroids in the host (Jiang et al. 2021). Another approach relies on isolating and culturing microbes from the host, characterizing metabolites from these microbes, and combining this information with data acquired from coral samples. This approach identified antioxidants and osmolytes, like betaine–lipids or glucosides from the coral microbiome, which are hypothesized to increase holobiont stress resistance (Gegner et al. 2017, Ochsenkühn et al. 2017, Roach et al. 2021). Despite its limitations, metabolomics is steadily gaining traction with improvements in protocols, instrumentation and analysis and is becoming a complementary tool with high predictive power (Lu et al. 2017, Greene et al. 2021, Wegley Kelly et al. 2021).

### **Multiomics data are urgently needed for a holistic understanding of the holobiont**

A single layer of omics is not usually adequate to understand a complex system such as the coral holobiont. An integrated host–microbiota multiomics framework has been developed and proposed to understand other holobiont systems (Nyholm et al. 2020). Nyholm et al. recently coined the term ‘holo-omics’ to describe experiments that aim to obtain multiple omics data from both host and microbiota domains. This holistic approach has been recently applied to study the plant microbiome (Zolti et al. 2020; for a review, see Xu et al. 2021b), the human microbiome (Heintz-Buschart et al. 2016, Lloyd-Price et al. 2019, Park et al. 2022) [for a review, see Zhang et al. (2019)]. For example, Lloyd-Price et al. (2019) provided a comprehensive multiomics data during the functional dysbiosis in the human gut microbiome upon the progression of the inflammatory bowel disease. In the Lloyd-Price paper, metagenomic, metatranscriptomic, and stool metabolomic profiles were combined to show a unique microbiome restructure characterized by an increase in facultative anaerobes at the expense of obligate anaerobes and identify biochemical and host factors central to this dysregulation.

In corals, most of the omics data generated were obtained solo; there have been attempts to attain multiomics data (Cziesielski et al. 2018, Maruyama et al. 2021, Santoro et al. 2021, Voolstra et al. 2021b, Williams et al. 2021b, Pogoreutz et al. 2022). However, most of these studies have exclusively relied on descriptive microbiome tools such as amplicon sequencing (Table 1), that have been significant in shaping our understanding of the coral microbiome composition; but limited in providing mechanistic insights into mechanisms of coral–microbiome interactions. However, a few examples showed the power of integrating metatranscriptomes and metagenomes to understand microbial processes during onset and progression of the black band disease (Arotsker et al. 2016, Sato et al. 2017). Williams et al. (2021) combined polar metabolomics with host transcriptomics to investigate gene–metabolite interactions in the coral *Montipora capitata* exposed to a 5-week period of thermal stress. The gene–metabolite integrated analysis revealed thermal stress affects reproductive activity evidenced by the downregulation of CYP-like genes and the irregular production of sex hormones. Despite these data being focused on the coral host, they provided a set of genes and metabolites that can be used as markers of coral thermal stress. Indeed, leveraging the integrated metatranscriptomic and metagenomic data would greatly enhance our understanding of onset of coral disease that will help in coral disease prognostics and coral bleaching management. Santoro

et al. (2021) was a clear example that made use of manipulative experiments, physiology to define the phenotype before collecting multiomics data, 16S rRNA amplicon sequencing, host gene expression, and metabolomes that were well correlated with physiological responses associated with health status. However, we currently lack comprehensive functional insights into coral–microbiome interactions, despite the recent advances in coral microbiome research. To reach a more comprehensive, systems-level view of coral–microbiome interactions, experiments should focus on pairing the host-centred omics data such as host transcriptome, epigenome, and metabolome/proteome with microbially centred data such as shotgun metagenomes, metatranscriptomes, and meta-metabolome/meta-proteome (Fig. 5).

### **Current limitations and new directions**

Despite years of significant work on cnidarian symbiosis [for reviews see Weis (2019), Rossett et al. (2021)], insights into the onset of coral–algal symbiosis (Davy et al. 2012, Mohamed et al. 2016, 2020b, Yoshioka et al. 2021), and more recently the role of nutrient cycling in the breakdown of coral–algal symbiosis during heat stress (Rädecker et al. 2022), a comprehensive mechanistic understanding of the synthesis, homeostasis, and demise of symbiosis due to coral bleaching is still lacking. Many of the current insights stem from studies conducted on other cnidarian species such as *Aiptasia* [see e.g. Celeves et al. (2020)] as a coral model, due to difficulties in experimentally manipulating corals in the lab. Only recently, the tropical stony coral species *Galaxea fascicularis* was proposed as a candidate coral model system (Puntin et al. 2022). This will indeed help us understand the molecular underpinnings of coral symbiosis in the near future.

Despite the high potential of multiomics data, the presence of cryptic biological information (‘biological dark matter’, e.g. the noncoding part of the genome (Eisenstein 2021) and hypothetical proteins with unknown function (Stephens et al. 2018) and cryptic or undescribed microbes (Lok 2015)) is a major limiting factor for understanding the coral holobiont. On the other hand, traditional molecular biology and biochemistry techniques to characterize gene/protein function are time consuming and are low throughput. Gene networks have been proven to detect hypothetical proteins with presumable importance (Cleves et al. 2020). By applying the ‘guilt by association’ principle, these genes/proteins or unclassified microbes connected with other genes/microbes of known function (Fig. 5) may shed light on their importance. A few such genes were co-expressed along other genes in the same module that was upregulated shortly after thermal stress (Cleves et al. 2020). These hypothetical proteins of interests can be then folded using Alpha-fold to gain more insights into their functionality (Ma et al. 2022). More methods such as RNA interference and CRISPR/CAS9-mediated genome editing that enable identification and characterization of microbial and gene functions are needed to overcome this major hurdle in biology.

Recent advances in genomics have allowed the construction of detailed cell type atlases for a soft coral (*Xenia* sp.) and a stony coral (*Stylophora pistillata*) using single-cell RNA sequencing (scRNA-seq) (Hu et al. 2020, Levy et al. 2021), chromosome-level genome assemblies (Fig. 5) for the soft coral *Xenia* sp. and the hard corals *A. millepora* and *M. capitata* (Fuller et al. 2020, Hu et al. 2020, Stephens et al. 2021), and the coral endosymbiont *S. microadriaticum* (Nand et al. 2021). Recent initiatives such as the Aquatic Symbiosis Genomics (ASG) project (McKenna et al. 2021) will provide chromosome-level genomes for ~500 symbiotic systems including corals and their microbiomes. Within the ASG project, a

**Table 1.** Recent coral studies adopting multiomics to investigate the molecular basis of disease onset, thermal tolerance, and symbiosis. The coral species, the 'omics approaches utilized, and the scope of the study are shown.

| Study                     | Coral species                                    | 'Omics approach                                                                                | Scope                                |
|---------------------------|--------------------------------------------------|------------------------------------------------------------------------------------------------|--------------------------------------|
| Daniels et al. 2015       | <i>Orbicella faveolata</i>                       | Metatranscriptomics<br>Host, algal/bacterial symbionts                                         | White plague disease                 |
| Sato et al. 2017          | <i>Montipora hispida</i>                         | Metatranscriptomics<br>Shotgun metagenomics                                                    | Black band disease                   |
| Meyer et al. 2017         | <i>Montastraea cavernosa</i>                     | 16S rRNA amplicon sequencing<br>Shotgun metagenomics                                           | Black band disease                   |
| Cziesielski et al. 2018   | <i>Aiptasia pallida</i> , a coral model          | Host transcriptomics                                                                           | Thermal stress                       |
| Cleves et al. 2020        | Review article                                   | Proteomics<br>Multiomics and reverse genetics                                                  | Thermal stress                       |
| Roach et al. 2020         | <i>Diploria strigosa</i> and <i>O. faveolata</i> | Shotgun metagenomics                                                                           | Coral-turf algal interactions        |
| Williams et al. 2021b     | <i>M. capitata</i>                               | Metabolomics<br>Host transcriptomics, metabolomics                                             | Thermal stress                       |
| Santoro et al. 2021       | <i>M. hispida</i>                                | 16S rRNA amplicon sequencing<br>Host transcriptomics<br>Metabolomics                           | Microbiome-enabled thermal tolerance |
| Voolstra et al. 2021b     | <i>Stylophora pistillata</i>                     | Host + algal transcriptomics and ITS2/16S rRNA amplicon sequencing                             | Thermal tolerance                    |
| Savary et al. 2021        | <i>S. pistillata</i>                             | Host + algal transcriptomics and ITS2/16S rRNA amplicon sequencing                             | Thermal tolerance                    |
| Maruyama et al. 2021/2021 | <i>Acropora tenuis</i>                           | Host + algal transcriptomics, 16S rRNA amplicon sequencing, and bacterial genome sequencing    | Coral-microbiota interactions        |
| Pogoreutz et al. 2022     | <i>A. humilis</i>                                | 16S rRNA amplicon sequencing, host transcriptomic, proteomics, and bacterial genome sequencing | Coral-Endozoicomonas symbiosis       |

combination of long-read and long-range genomic data will be generated using the Pacific Biosciences sequencing platform to generate high fidelity reads in the 15–20 kb range, along with Oxford Nanopore long-read technologies. Transcriptome data will be generated to help annotate those genomes. Chromatin conformation capture sequencing, known as 3C or Hi-C, will be used to link sequences within chromosomes and organelles (Belton et al. 2012). The same proximity ligation strategy has been developed recently to study the microbiome (meta3C). The ProxiMeta platform is designed to deconvolute chromosomes and plasmids in a mixed microbial sample into complete genomes (Stadler et al. 2019). More recently, spatial transcriptomics (based on 10× Genomics data) has been developed to couple gene expression data with spatial information (spatially resolved transcriptomes) that enable measuring all the gene activity in a given tissue sample and mapping where the activity is occurring (Larsson et al. 2021, Rao et al. 2021). These new approaches will enable disentangling functions of different microbiome members within the holobiont. These data will provide baseline genomic resources that will revolutionize the way researchers look at and design symbiosis experiments to understand the molecular mechanisms underlying homeostasis of the coral holobionts and their responses to climate change.

The Assay of Transposase Accessible Chromatin sequencing (ATAC-seq) has become increasingly popular for detecting chromatin accessibility (Yan et al. 2020). The quest of identifying regulatory elements across different cell types and developmental stages has led to large international efforts mostly focusing on model organisms, such as the human Encyclopedia of DNA Elements (ENCODE; Moore et al. 2020), and the Functional An-

notation of Animal Genomes (FAANG; Giuffra et al. 2019), to unravel the regulatory elements in model/nonmodel organisms. Spatiotemporal changes in the epigenome at the chromatin level are crucial to development, cellular differentiation, health, and disease (Gorkin et al. 2020, Fang et al. 2021). In corals, epigenetic mechanisms have been exclusively studied through DNA methylation. The study by Liew et al. (2018) reported that DNA methylation levels in corals are highly sparse, where only 9% of genome-wide CpG loci were methylated, most of which are co-located within gene bodies, in contrast to higher-level genome-wide methylation levels in promoters and enhancers in vertebrates. ATAC-seq data, paired with RNA-seq, was utilized for the first time to study the cnidarian-dinoflagellate model *Exaptasia pallida* to reveal a role of chromatin dynamics in response to thermal stress (Weizman and Levy 2019). Compared to DNA methylation, chromatin accessibility data (Fig. 5) hold a great promise towards understanding epigenetic mechanisms and their role in regulating gene expression in corals as shown for other non-model species (Alexandre et al. 2021, Mohamed et al. 2022). Indeed, defining the coral regulatory vocabulary would allow understanding many aspects of coral biology including responses to climate change at an unprecedented level.

The use of the forementioned omics technologies and their integration will be only valuable when combined with specific manipulative experiments with accurate physiological and/or environmental monitoring to be correlated with the molecular and/or microbial data. The correlation of the multiomics data with the holobiont's physiological status (phenotype) would provide valid hypothesis to be developed to understand coral thermal thresholds, their response to stress, susceptibility to pathogens, and



resilience. Finally, these hypotheses have to be validated with further genetic or microbial manipulative experiments to confirm these sequencing-based findings (Fig. 6).

## Conclusion

Despite the recent development of molecular tools for understanding the diversity and function of coral holobionts, a mechanistic knowledge of the coral microbiome and its role in coral evolution and adaptation is still missing. Here, we charted an overview of the taxonomic diversity and function of microbiota associated with corals, the latest updates on coral microbiome research, and insights into the possible mechanisms through which coral–microbiota interactions could occur. We highlight that while most ‘omics techniques developed for corals have been powerful, integrated ‘coral–microbiota’ multiomics data are needed for holistic and systems-level understanding of the mechanisms underpinning the symbiotic and dysbiotic interactions within the coral holobiont. We also point the importance of the coral regulatory circuits and elements in responding to the microbiome and environmental change and how this knowledge can be used in an integrated multiomics framework. These advances, especially when combined with specific manipulative experiments and/or field samples and correlated with physiological status, promise to push the boundaries of knowledge of coral–microbiome research and may help global efforts to preserve corals in the future.

## Acknowledgements

We would like to thank Mr. Glynn Gorick for his help creating Fig. 1. Figures 3–6 were created with BioRender.com.

## Supplementary data

Supplementary data is available at [FEMSREonline](https://femsre.onlinelibrary.wiley.com/doi/10.1111/femsre.12500).

**Conflict of interest statement.** The authors declare no conflict of interest.

## Funding

This work was supported by Tamkeen under the NYU Abu Dhabi Research Institute Award to the NYUAD Center for Genomics and Systems Biology (ADHPG-CGSB) and the NYU Abu Dhabi grant [grant number AD179] to S.A.A.

## References

- Agliano F, Rathinam VA, Medvedev AE et al. Long noncoding RNAs in host–pathogen interactions. *Trends Immunol* 2019;**40**:492–510.
- Ahmadi Badi S, Moshiri A, Fateh A et al. Microbiota-derived extracellular vesicles as new systemic regulators. *Front Microbiol* 2017;**8**:1610.
- Ainsworth T, Krause L, Bridge T et al. The coral core microbiome identifies rare bacterial taxa as ubiquitous endosymbionts. *ISME J* 2015;**9**:2261–74.
- Ainsworth TD, Fordyce AJ, Camp EF. The other microeukaryotes of the coral reef microbiome. *Trends Microbiol* 2017;**25**:980–91.
- Aird D, Ross MG, Chen W-S et al. Analyzing and minimizing PCR amplification bias in Illumina sequencing libraries. *Genome Biol* 2011;**12**:1–14.
- Alexandre PA, Naval-Sánchez M, Menzies M et al. Chromatin accessibility and regulatory vocabulary across indicine cattle tissues. *Genome Biol* 2021;**22**:1–20.
- Ambalavanan L, Iehata S, Fletcher R et al. A review of marine viruses in coral ecosystem. *J Mar Sci Eng* 2021;**9**:711.
- Amend AS, Barshis DJ, Oliver TA. Coral-associated marine fungi form novel lineages and heterogeneous assemblages. *ISME J* 2012;**6**:1291–301.
- Amin SA, Green DH, Hart MC et al. Photolysis of iron–siderophore chelates promotes bacterial–algal mutualism. *Proc Natl Acad Sci* 2009;**106**:17071–6.
- Amin SA, Hmelo LR, van Tol HM, et al. Interaction and signalling between a cosmopolitan phytoplankton and associated bacteria. *Nature* 2015;**522**:98–101.
- Amin SA, Parker MS, Armbrust EV. Interactions between diatoms and bacteria. *Microbiol Mol Biol Rev* 2012;**76**:667–84.
- Anderson DA, Walz ME, Weil E et al. RNA-seq of the Caribbean reef-building coral *Orbicella faveolata* (Scleractinia–Merulinidae) under bleaching and disease stress expands models of coral innate immunity. *PeerJ* 2016;**4**:e1616.
- Andersson ER, Day RD, Loewenstein JM et al. Evaluation of sample preparation methods for the analysis of reef-building corals using 1H-NMR-based metabolomics. *Metabolites* 2019;**9**:32.
- Aranda M, Li Y, Liew YJ et al. Genomes of coral dinoflagellate symbionts highlight evolutionary adaptations conducive to a symbiotic lifestyle. *Sci Rep* 2016;**6**:39734.
- Arotsker L, Kramarsky-Winter E, Ben-Dov E et al. Microbial transcriptome profiling of black band disease in a Faviid coral during a seasonal disease peak. *Dis Aquat Organ* 2016;**118**:77–89.
- Aßhauer KP, Wemheuer B, Daniel R et al. Tax4Fun: predicting functional profiles from metagenomic 16S rRNA data. *Bioinformatics* 2015;**31**:2882–4.
- Avila-Magana V, Kamel B, DeSalvo M et al. Elucidating gene expression adaptation of phylogenetically divergent coral holobionts under heat stress. *Nat Commun* 2021;**12**:5731.
- Bang C, Dagan T, Deines P et al. Metaorganisms in extreme environments: do microbes play a role in organismal adaptation? *Zoology* 2018;**127**:1–19.
- Barno AR, Vilella HD, Aranda M et al. Host under epigenetic control: a novel perspective on the interaction between microorganisms and corals. *Bioessays* 2021;**43**:2100068.
- Barr JJ, Auro R, Furlan M et al. Bacteriophage adhering to mucus provide a non-host-derived immunity. *Proc Natl Acad Sci* 2013;**110**:10771–6.
- Barshis DJ, Ladner JT, Oliver TA et al. Genomic basis for coral resilience to climate change. *Proc Natl Acad Sci* 2013;**110**:1387–92.
- Baumgarten S, Cziesielski MJ, Thomas L et al. Evidence for miRNA-mediated modulation of the host transcriptome in cnidarian–dinoflagellate symbiosis. *Mol Ecol* 2018;**27**:403–18.
- Baumgarten S, Simakov O, Esherick LY et al. The genome of *Aiptasia*, a sea anemone model for coral symbiosis. *Proc Natl Acad Sci* 2015;**112**:11893–8.
- Bay LK, Cumbo VR, Abrego D et al. Infection dynamics vary between *Symbiodinium* types and cell surface treatments during establishment of endosymbiosis with coral larvae. *Diversity* 2011;**3**:356–74.
- Bay RA, Palumbi SR. Transcriptome predictors of coral survival and growth in a highly variable environment. *Ecol Evol* 2017;**7**:4794–803.
- Bayer T, Neave MJ, Alsheikh-Hussain A et al. The microbiome of the Red Sea coral *Stylophora pistillata* is dominated by tissue-associated *Endozoicomonas* bacteria. *Appl Environ Microbiol* 2013;**79**:4759–62.

- Bellantuono AJ, Dougan KE, Granados-Cifuentes C et al. Free-living and symbiotic lifestyles of a thermotolerant coral endosymbiont display profoundly distinct transcriptomes under both stable and heat stress conditions. *Mol Ecol* 2019;**28**:5265–81.
- Belton J-M, McCord RP, Gibcus JH et al. Hi-C: a comprehensive technique to capture the conformation of genomes. *Methods* 2012;**58**:268–76.
- Beman JM, Popp BN, Francis CA. Molecular and biogeochemical evidence for ammonia oxidation by marine Crenarchaeota in the Gulf of California. *ISME J* 2008;**2**:429–41.
- Ben-Haim Y, Thompson FL, Thompson CC et al. *Vibrio coralliilyticus* sp. nov., a temperature-dependent pathogen of the coral *Pocillopora damicornis*. *Int J Syst Evol Microbiol* 2003;**53**:309–15.
- Benavides M, Bednarz VN, Ferrier-Pagès C. Diazotrophs: overlooked key players within the coral symbiosis and tropical reef ecosystems? *Front Mar Sci* 2017;**4**:10. doi:10.3389/fmars.2017.00010
- Berkelmans R, van Oppen MJ. The role of zooxanthellae in the thermal tolerance of corals: a ‘nugget of hope’ for coral reefs in an era of climate change. *Proc Biol Sci* 2006;**273**:2305–12.
- Berthelot J, Schnitzler CE, Wood-Charlson EM et al. Implication of the host *tgfb* pathway in the onset of symbiosis between larvae of the coral *Fungia scutaria* and the dinoflagellate *Symbiodinium* sp. (clade C1f). *Coral Reefs* 2017;**36**:1263–8.
- Beurmann S, Ushijima B, Videau P et al. *Pseudoalteromonas piratica* strain OCN003 is a coral pathogen that causes a switch from chronic to acute *Montipora* white syndrome in *Montipora capitata*. *PLoS One* 2017;**12**:e0188319.
- Blackall LL, Wilson B, van Oppen MJ. Coral—the world’s most diverse symbiotic ecosystem. *Mol Ecol* 2015;**24**:5330–47.
- Blenkiron C, Simonov D, Muthukaruppan A et al. Uropathogenic *Escherichia coli* releases extracellular vesicles that are associated with RNA. *PLoS One* 2016;**11**:e0160440.
- Botwright NA, Mohamed AR, Slinger J et al. Host–parasite interaction of Atlantic salmon (*Salmo salar*) and the ectoparasite *Neoparamoeba perurans* in amoebic gill disease. *Front Immunol* 2021;**12**:672700.
- Bourne D, Iida Y, Uthicke S et al. Changes in coral-associated microbial communities during a bleaching event. *ISME J* 2008;**2**:350–63.
- Bourne DG, Morrow KM, Webster NS. Insights into the coral microbiome: underpinning the health and resilience of reef ecosystems. *Annu Rev Microbiol* 2016;**70**:317–40.
- Brown T, Rodriguez-Lanetty M. Defending against pathogens-immunological priming and its molecular basis in a sea anemone, cnidarian. *Sci Rep* 2015;**5**:1–14.
- Bruckner AW. History of coral disease research. In: Woodley CM, Downs CA, Bruckner AW, Porter JW, Galloway SB (eds.), *Diseases of Coral*. 2015, 52–84.
- Bruwer JD, Agrawal S, Liew YJ et al. Association of coral algal symbionts with a diverse viral community responsive to heat shock. *BMC Microbiol* 2017;**17**:174.
- Buerger P, Alvarez-Roa C, Coppin CW et al. Heat-evolved microalgal symbionts increase coral bleaching tolerance. *Sci Adv* 2020;**6**:eaba2498.
- Burge CA, Mouchka ME, Harvell CD et al. Immune response of the Caribbean sea fan, *Gorgonia ventalina*, exposed to an *Aplanochytrium* parasite as revealed by transcriptome sequencing. *Front Physiol* 2013;**4**:180.
- Cai L, Zhou G, Tian RM et al. Metagenomic analysis reveals a green sulfur bacterium as a potential coral symbiont. *Sci Rep* 2017;**7**:9320.
- Camp EF, Kahlke T, Nitschke MR et al. Revealing changes in the microbiome of Symbiodiniaceae under thermal stress. *Environ Microbiol* 2020;**22**:1294–309.
- Camp EF, Kahlke T, Signal B et al. Proteome metabolome and transcriptome data for three Symbiodiniaceae under ambient and heat stress conditions. *Scientific Data* 2022;**9**:153.
- Cánovas A, Reverter A, DeAtley KL et al. Multi-tissue omics analyses reveal molecular regulatory networks for puberty in composite beef cattle. *PLoS One* 2014;**9**:e102551.
- Canzio D, Nwakeze CL, Horta A et al. Antisense lncRNA transcription mediates DNA demethylation to drive stochastic protocadherin  $\alpha$  promoter choice. *Cell* 2019;**177**:639–653.e15.
- Cardenas A, Rodriguez RL, Pizarro V et al. Shifts in bacterial communities of two Caribbean reef-building coral species affected by white plague disease. *ISME J* 2012;**6**:502–12.
- Cardenas A, Ye J, Ziegler M et al. Coral-associated viral assemblages from the Central Red Sea align with host species and contribute to holobiont genetic diversity. *Front Microbiol* 2020;**11**:572534.
- Casamatta D, Stanić D, Gantar M et al. Characterization of *Roseofilum reptotaenium* (Oscillatoriales, Cyanobacteria) gen. et sp. nov. isolated from Caribbean black band disease. *Phycologia* 2012;**51**:489–99.
- Ceh J, Kilburn MR, Cliff JB et al. Nutrient cycling in early coral life stages: *Pocillopora damicornis* larvae provide their algal symbiont (*Symbiodinium*) with nitrogen acquired from bacterial associates. *Ecol Evol* 2013;**3**:2393–400.
- Certner RH, Vollmer SV. Evidence for autoinduction and quorum sensing in white band disease-causing microbes on *Acropora cervicornis*. *Sci Rep* 2015;**5**:1–9.
- Certner RH, Vollmer SV. Inhibiting bacterial quorum sensing arrests coral disease development and disease-associated microbes. *Environ Microbiol* 2018;**20**:645–57.
- Chakravarti LJ, Beltran VH, van Oppen MJ. Rapid thermal adaptation in photosymbionts of reef-building corals. *Global Change Biol* 2017;**23**:4675–88.
- Chakravarti LJ, van Oppen MJ. Experimental evolution in coral photosymbionts as a tool to increase thermal tolerance. *Front Mar Sci* 2018;**5**:227.
- Chen J, Guo Y, Jia Y et al. Diversity, function and evolution of marine microbe genomes. *bioRxiv* 2021. <https://doi.org/10.1101/2021.10.26.465843>.
- Cirri E, Pohnert G. Algae–bacteria interactions that balance the planktonic microbiome. *New Phytol* 2019;**223**:100–6.
- Clerissi C, Brunet S, Vidal-Dupiol J et al. Protists within corals: the hidden diversity. *Front Microbiol* 2018;**9**:2043.
- Cleves PA, Tinoco AI, Bradford J et al. Reduced thermal tolerance in a coral carrying CRISPR-induced mutations in the gene for a heat-shock transcription factor. *Proc Natl Acad Sci* 2020;**117**:28899–905.
- Cooke I, Mead O, Whalen C et al. Molecular techniques and their limitations shape our view of the holobiont. *Zoology* 2019;**137**:125695.
- Coombes BK. Type III secretion systems in symbiotic adaptation of pathogenic and non-pathogenic bacteria. *Trends Microbiol* 2009;**17**:89–94.
- Cui G, Liew YJ, Li Y et al. Host-dependent nitrogen recycling as a mechanism of symbiont control in *Aiptasia*. *PLoS Genet* 2019;**15**:e1008189.
- Cunning R, Muller EB, Gates RD et al. A dynamic bioenergetic model for coral–*Symbiodinium* symbioses and coral bleaching as an alternate stable state. *J Theor Biol* 2017;**431**:49–62.
- Cziesielski MJ, Liew YJ, Cui G et al. Multi-omics analysis of thermal stress response in a zooxanthellate cnidarian reveals the importance of associating with thermotolerant symbionts. *Pro R Soc B Biol Sci* 2018;**285**:20172654.
- Daniels CA, Baumgarten S, Yum LK et al. Metatranscriptome analysis of the reef-building coral *Orbicella faveolata* indicates holobiont response to coral disease. *Front Mar Sci* 2015;**2**:62.

- Davison JM, Lickwar CR, Song L et al. Microbiota regulate intestinal epithelial gene expression by suppressing the transcription factor hepatocyte nuclear factor 4 alpha. *Genome Res* 2017;**27**:1195–206.
- Davy SK, Allemand D, Weis VM. Cell biology of cnidarian–dinoflagellate symbiosis. *Microbiol Mol Biol Rev* 2012;**76**:229–61.
- De Kievit TR, Iglewski BH. Bacterial quorum sensing in pathogenic relationships. *Infect Immun* 2000;**68**:4839–49.
- Del Campo J, Pombert JF, Slapeta J et al. The ‘other’ coral symbiont: ostreobium diversity and distribution. *ISME J* 2017;**11**:296–9.
- Denner EB, Smith GW, Busse H-J et al. *Aurantimonas coralicida* gen. nov., sp. nov., the causative agent of white plague type II on Caribbean scleractinian corals. *Int J Syst Evol Microbiol* 2003;**53**:1115–22.
- Detournay O, Schnitzler CE, Poole A et al. Regulation of cnidarian–dinoflagellate mutualisms: evidence that activation of a host *tgfβ* innate immune pathway promotes tolerance of the symbiont. *Dev Comp Immunol* 2012;**38**:525–37.
- Detournay O, Weis VM. Role of the sphingosine rheostat in the regulation of cnidarian–dinoflagellate symbioses. *Biol Bull* 2011;**221**:261–9.
- Deutsch JM, Jaiyesimi OA, Pitts KA et al. Metabolomics of healthy and stony coral tissue loss disease affected *Montastraea cavernosa* corals. *Front Mar Sci* 2021;**8**:714778. doi:10.3389/fmars.2021.714778
- Dixon G, Liao Y, Bay LK et al. Role of gene body methylation in acclimatization and adaptation in a basal metazoan. *Proc Natl Acad Sci* 2018;**115**:13342–6.
- Doering T, Wall M, Putchim L et al. Towards enhancing coral heat tolerance: a “microbiome transplantation” treatment using inoculations of homogenized coral tissues. *Microbiome* 2021;**9**:1–16.
- Douglas GM, Maffei VJ, Zaneveld JR et al. PICRUSt2 for prediction of metagenome functions. *Nat Biotechnol* 2020;**38**:685–8.
- Downs CA, Kramarsky-Winter E, Martinez J et al. Symbiophagy as a cellular mechanism for coral bleaching. *Autophagy* 2009;**5**:211–6.
- Dungan AM, Bulach D, Lin H et al. Development of a free radical scavenging bacterial consortium to mitigate oxidative stress in cnidarians. *Microb Biotechnol* 2021;**14**:2025–40.
- Durham BP, Sharma S, Luo H et al. Cryptic carbon and sulfur cycling between surface ocean plankton. *Proc Natl Acad Sci* 2015;**112**:453–7.
- Ebert MS, Sharp PA. MicroRNA sponges: progress and possibilities. *RNA* 2010;**16**:2043–50.
- Eirin-Lopez JM, Putnam HM. Marine environmental epigenetics. *Ann Rev Mar Sci* 2019;**11**:335–68.
- Eisenstein M. Drug hunters uncloak the non-coding ‘hidden’ genome. *Nat Biotechnol* 2021;**39**:1169–71. <https://doi.org/10.1038/s41587-021-01088-y>
- Engelberts JP, Robbins SJ, Damjanovic K et al. Integrating novel tools to elucidate the metabolic basis of microbial symbiosis in reef holobionts. *Mar Biol* 2021; **168**:1–19.
- Engelen AH, Aires T, Vermeij MJ et al. Host differentiation and compartmentalization of microbial communities in the Azooxanthellate cupcorals *Tubastrea coccinea* and *Rhizopsammia goesi* in the Caribbean. *Front Mar Sci* 2018;**5**:391.
- Falkowski PG, Dubinsky Z, Muscatine L et al. Population control in symbiotic corals. *Bioscience* 1993;**43**:606–11.
- Fang R, Preissl S, Li Y et al. Comprehensive analysis of single cell ATAC-seq data with SnapATAC. *Nat Commun* 2021;**12**:1–15.
- Fei C, Ochsenkühn MA, Shibl AA et al. Quorum sensing regulates ‘swim-or-stick’ lifestyle in the phycosphere. *Environ Microbiol* 2020;**22**:4761–78.
- Fine M, Loya Y. Endolithic algae: an alternative source of photoassimilates during coral bleaching. *Proc R Soc Lond B Biol Sci* 2002;**269**:1205–10.
- Fragoso Ados Santos H, Duarte GA, Rachid CT et al. Impact of oil spills on coral reefs can be reduced by bioremediation using probiotic microbiota. *Sci Rep* 2015;**5**:18268.
- Frazier M, Helmkamp M, Bellinger MR et al. De novo metatranscriptome assembly and coral gene expression profile of *Montipora capitata* with growth anomaly. *BMC Genomics* 2017;**18**:710.
- Freudenthal HD. *Symbiodinium* gen. nov. and *Symbiodinium microadriaticum* sp. nov., a zooxanthella: taxonomy, life cycle, and morphology. *J Protozool* 1962;**9**:45–52.
- Fuller ZL, Mocellin VJL, Morris LA et al. Population genetics of the coral *Acropora millepora*: toward genomic prediction of bleaching. *Science* 2020;**17**:369.
- Galindo-Martinez CT, Weber M, Avila-Magana V et al. The role of the endolithic alga *Ostreobium* spp. during coral bleaching recovery. *Sci Rep* 2022;**12**:2977.
- Garcia-Garcia JC, Barat NC, Trembley SJ et al. Epigenetic silencing of host cell defense genes enhances intracellular survival of the rickettsial pathogen *Anaplasma phagocytophilum*. *PLoS Pathog* 2009;**5**:e1000488.
- Garrido AG, Machado LF, Zilberberg C et al. Insights into ‘Symbiodiniaceae phycosphere’ in a coral holobiont. *Symbiosis* 2021;**83**:25–39.
- Gegner HM, Rädcker N, Ochsenkühn M et al. High levels of floridoside at high salinity link osmoadaptation with bleaching susceptibility in the cnidarian–algal endosymbiosis. *Biology Open* 2019;**8**:bio045591.
- Gegner HM, Ziegler M, Radecker N et al. High salinity conveys thermotolerance in the coral model *Aiptasia*. *Biol Open* 2017;**6**:1943–8.
- Geisler S, Collier J. RNA in unexpected places: long non-coding RNA functions in diverse cellular contexts. *Nat Rev Mol Cell Biol* 2013;**14**:699–712.
- Gilmore TD, Wolenski FS. NF-κB: where did it come from and why? *Immunol Rev* 2012;**246**:14–35.
- Giuffra E, Tuggle CK, Consortium F. Functional Annotation of Animal genomes (FAANG): current achievements and roadmap. *Annu Rev Anim Biosci* 2019;**7**:65–88.
- Golubic S, Radtke G, Le Campion-Alsumard T. Endolithic fungi in marine ecosystems. *Trends Microbiol* 2005;**13**:229–35.
- Gonzalez-Pech RA, Stephens TG, Chen Y et al. Comparison of 15 dinoflagellate genomes reveals extensive sequence and structural divergence in family Symbiodiniaceae and genus *Symbiodinium*. *BMC Biol* 2021;**19**:73.
- Gorkin DU, Barozzi I, Zhao Y et al. An atlas of dynamic chromatin landscapes in mouse fetal development. *Nature* 2020;**583**:744–51.
- Gourbal B, Pinaud S, Beckers GJ et al. Innate immune memory: an evolutionary perspective. *Immunol Rev* 2018;**283**:21–40.
- Green ER, Meccas J. Bacterial secretion systems: an overview. *Microbiol Spectr* 2016;**4**:VMBF-0012-2015.
- Greene S, Ruha AM, Campleman S et al. Epidemiology, clinical features, and management of Texas coral snake (*Micrurus tener*) envenomations reported to the North American snakebite registry. *J Med Toxicol* 2021;**17**:51–56.
- Haas A, Fairouz M, Kelly L et al. Global microbialization of coral reefs. *Nat Microbiol* 2016;**1**:16042. <https://doi.org/10.1038/nmicrobiol.2016.42>
- Hamada M, Shoguchi E, Shinzato C et al. The complex NOD-like receptor repertoire of the coral *Acropora digitifera* includes novel domain combinations. *Mol Biol Evol* 2013;**30**:167–76.
- Hangauer MJ, Vaughn IW, McManus MT. Pervasive transcription of the human genome produces thousands of previously unidentified long intergenic noncoding rnas. *PLoS Genet* 2013;**9**:e1003569.

- Hartmann AC, Petras D, Quinn RA *et al.* Meta-mass shift chemical profiling of metabolomes from coral reefs. *Proc Natl Acad Sci* 2017;**114**:11685–90.
- Heintz-Buschart A, May P, Laczny CC *et al.* Integrated multi-omics of the human gut microbiome in a case study of familial type 1 diabetes. *Nat Microbiol* 2016;**2**:1–13.
- Hernandez-Agreda A, Leggat W, Ainsworth TD. A place for taxonomic profiling in the study of the coral prokaryotic microbiome. *FEMS Microbiol Lett* 2019;**366**:fnz063.
- Hernandez-Agreda A, Leggat W, Bongaerts P *et al.* Rethinking the coral microbiome: simplicity exists within a diverse microbial biosphere. *mBio* 2018;**9**: e00812–18. <https://doi.org/10.1128/mBio.00812-18>
- Hernandez-Agreda A, Leggat W, Bongaerts P *et al.* The microbial signature provides insight into the mechanistic basis of coral success across reef habitats. *mBio* 2016;**7**:e00560–16.
- Hillyer KE, Dias D, Lutz A *et al.* <sup>13</sup>C metabolomics reveals widespread change in carbon fate during coral bleaching. *Metabolomics* 2017a;**14**:12.
- Hillyer KE, Dias DA, Lutz A *et al.* Metabolite profiling of symbiont and host during thermal stress and bleaching in the coral *Acropora aspera*. *Coral Reefs* 2017b;**36**:105–18.
- Hofer U. The majority is uncultured. *Nat Rev Microbiol* 2018;**16**:716–7.
- Howells EJ, Vaughan GO, Work TM *et al.* Annual outbreaks of coral disease coincide with extreme seasonal warming. *Coral Reefs* 2020;**39**:771–81.
- Hu JX, Thomas CE, Brunak S. Network biology concepts in complex disease comorbidities. *Nat Rev Genet* 2016;**17**:615–29.
- Hu M, Zheng X, Fan CM *et al.* Lineage dynamics of the endosymbiotic cell type in the soft coral *Xenia*. *Nature* 2020;**582**:534–8.
- Huang C, Leng D, Sun S *et al.* Re-analysis of the coral *Acropora digitifera* transcriptome reveals a complex lncRNAs–mRNAs interaction network implicated in *Symbiodinium* infection. *BMC Genomics* 2019;**20**:48.
- Huang C, Morlighem JRL, Cai J *et al.* Identification of long non-coding RNAs in two anthozoan species and their possible implications for coral bleaching. *Sci Rep* 2017;**7**:5333.
- Hudson NJ, Dalrymple BP, Reverter A. Beyond differential expression: the quest for causal mutations and effector molecules. *BMC Genomics* 2012;**13**:1–16.
- Hug L, Baker B, Anantharaman K *et al.* A new view of the tree of life. *Nat Microbiol* 2016;**1**:16048. <https://doi.org/10.1038/nmicrobiol.2016.48>
- Huggett MJ, Apprill A. Coral microbiome database: integration of sequences reveals high diversity and relatedness of coral-associated microbes. *Environ Microbiol Rep* 2019;**11**:372–85.
- Ideker T, Krogan NJ. Differential network biology. *Mol Syst Biol* 2012;**8**:565.
- Iha C, Dougan KE, Varela JA *et al.* Genomic adaptations to an endolithic lifestyle in the coral-associated alga *Ostreobium*. *Curr Biol* 2021;**31**:1393–402.e5.
- Jacobovitz MR, Rupp S, Voss PA *et al.* Dinoflagellate symbionts escape vomocytosis by host cell immune suppression. *Nat Microbiol* 2021;**6**:769–82.
- Janouskovec J, Horak A, Barott KLet *et al.* Environmental distribution of coral-associated relatives of apicomplexan parasites. *ISME J* 2013;**7**:444–7.
- Janouskovec J, Horak A, Barott KLet *et al.* Global analysis of plastid diversity reveals apicomplexan-related lineages in coral reefs. *Curr Biol* 2012;**22**:R518–9.
- Jaspers C, Fraune S, Arnold AE *et al.* Resolving structure and function of metaorganisms through a holistic framework combining reductionist and integrative approaches. *Zoology* 2019;**133**:81–87.
- Jiang J, Wang A, Deng X *et al.* How Symbiodiniaceae meets the challenges of life during coral bleaching. *Coral Reefs* 2021;**40**:1339–53.
- Jiao J-Y, Liu L, Hua Z-S *et al.* Microbial dark matter coming to light: challenges and opportunities. *Natl Sci Rev* 2021;**8**:nwaa280.
- Johnson JS, Spakowicz DJ, Hong B-Y *et al.* Evaluation of 16S rRNA gene sequencing for species and strain-level microbiome analysis. *Nat Commun* 2019;**10**:1–11.
- Jorissen H, Galand PE, Bonnard I *et al.* Coral larval settlement preferences linked to crustose coralline algae with distinct chemical and microbial signatures. *Sci Rep* 2021;**11**:14610.
- Katoh K, Misawa K, Kuma K *et al.* MAFFT: a novel method for rapid multiple sequence alignment based on fast fourier transform. *Nucleic Acids Res* 2002;**30**:3059–66. doi: 10.1093/nar/gkf436.
- Keeling PJ, Mathur V, Kwong WK *et al.* The elusive coral-infecting apicomplexans. *PLoS Pathog* 2021;**17**:e1009845.
- Keller-Costa T, Lago-Lestón A, Saraiva J *et al.* Metagenomic insights into the taxonomy, function, and dysbiosis of prokaryotic communities in octocorals. *Microbiome* 2021;**9**:1–21.
- Kellogg CA, Pratte ZA. Unexpected diversity of endozoicomonas in deep-sea corals. *Mar Ecol Prog Ser* 2021;**673**:1–15.
- Kellogg CA. Tropical archaea: diversity associated with the surface microlayer of corals. *Mar Ecol Prog Ser* 2004;**273**:81–88.
- Kimes NE, Van Nostrand JD, Weil E *et al.* Microbial functional structure of *Montastraea faveolata*, an important Caribbean reef-building coral, differs between healthy and yellow-band diseased colonies. *Environ Microbiol* 2010;**12**:541–56.
- Kirk NL, Ritson-Williams R, Coffroth MA *et al.* Tracking transmission of apicomplexan symbionts in diverse Caribbean corals. *PLoS One* 2013;**8**:e80618.
- Kitchen SA, Poole AZ, Weis VM. Sphingolipid metabolism of a sea anemone is altered by the presence of dinoflagellate symbionts. *Biol Bull* 2017;**233**:242–54.
- Kitchen SA, Weis VM. The sphingosine rheostat is involved in the cnidarian heat stress response but not necessarily in bleaching. *J Exp Biol* 2017;**220**:1709–20.
- Klinges G, Maher RL, Vega Thurber RL *et al.* Parasitic ‘*Candidatus Aquarickettsia rohweri*’ is a marker of disease susceptibility in *Acropora cervicornis* but is lost during thermal stress. *Environ Microbiol* 2020;**22**:5341–55.
- Knowles B, Silveira CB, Bailey BA *et al.* Lytic to temperate switching of viral communities. *Nature* 2016;**531**:466–70. doi: 10.1038/nature17193.
- Kogure A, Kosaka N, Ochiya T. Cross-talk between cancer cells and their neighbors via miRNA in extracellular vesicles: an emerging player in cancer metastasis. *J Biomed Sci* 2019;**26**:1–8.
- Kornmann P, Sahling P-H. *Ostreobium quekettii* (Codiales, Chlorophyta). *Helgoländer Meeresuntersuchungen* 1980;**34**:115–22.
- Krautkramer KA, Rey FE, Denu JM. Chemical signaling between gut microbiota and host chromatin: what is your gut really saying? *J Biol Chem* 2017;**292**:8582–93.
- Kwong WK, Del Campo J, Mathur V *et al.* A widespread coral-infecting apicomplexan with chlorophyll biosynthesis genes. *Nature* 2019;**568**:103–7.
- Lajeunesse TC, Parkinson JE, Gabrielson PW *et al.* Systematic revision of Symbiodiniaceae highlights the antiquity and diversity of coral endosymbionts. *Curr Biol* 2018;**28**:2570–2580.e6.
- Langfelder P, Horvath S. WGCNA: an R package for weighted correlation network analysis. *BMC Bioinf* 2008;**9**:1–13.
- Langille MG, Zaneveld J, Caporaso JG *et al.* Predictive functional profiling of microbial communities using 16S rRNA marker gene sequences. *Nat Biotechnol* 2013;**31**:814–21.
- Larsson L, Frisén J, Lundeberg J. Spatially resolved transcriptomics adds a new dimension to genomics. *Nat Methods* 2021;**18**:15–18.

- Lawson CA, Raina JB, Kahlke T et al. Defining the core microbiome of the symbiotic dinoflagellate, *Symbiodinium*. *Environ Microbiol Rep* 2018;**10**:7–11.
- Le Campion-Alsumard T, Golubic S, Priess K. Fungi in corals: symbiosis or disease? Interaction between polyps and fungi causes pearl-like skeleton biomineralization. *Mar Ecol Prog Ser* 1995;**117**:137–47.
- Lee H, Groot M, Pinilla-Vera M et al. Identification of miRNA-rich vesicles in bronchoalveolar lavage fluid: insights into the function and heterogeneity of extracellular vesicles. *J Controlled Release* 2019;**294**:43–52.
- Leite DCA, Salles JF, Calderon EN et al. Coral bacterial-core abundance and network complexity as proxies for anthropogenic pollution. *Front Microbiol* 2018;**9**:833. doi: 10.3389/fmicb.2018.00833.
- Lema KA, Bourne DG, Willis BL. Onset and establishment of diazotrophs and other bacterial associates in the early life history stages of the coral *Acropora millepora*. *Mol Ecol* 2014;**23**:4682–95.
- Lema KA, Willis BL, Bourne DG. Corals form characteristic associations with symbiotic nitrogen-fixing bacteria. *Appl Environ Microbiol* 2012;**78**:3136–44.
- Lesser MP, Morrow KM, Pankey SM et al. Diazotroph diversity and nitrogen fixation in the coral *Stylophora pistillata* from the Great Barrier Reef. *ISME J* 2018;**12**:813–24.
- Levy S, Elek A, Grau-Bové X et al. A stony coral cell atlas illuminates the molecular and cellular basis of coral symbiosis, calcification, and immunity. *Cell* 2021;**184**:2973–87.e18.
- Li S, Chen M, Chen Y et al. Epibiotic bacterial community composition in red-tide dinoflagellate *Akashiwo sanguinea* culture under various growth conditions. *FEMS Microbiol Ecol* 2019;**95**:fiz057.
- Libro S, Kaluziak ST, Vollmer SV. RNA-seq profiles of immune related genes in the staghorn coral *Acropora cervicornis* infected with white band disease. *PLoS One* 2013;**8**:e81821.
- Liew YJ, Aranda M, Carr A et al. Identification of microRNAs in the coral *Stylophora pistillata*. *PLoS One* 2014;**9**:e91101.
- Liew YJ, Zoccola D, Li Y et al. Epigenome-associated phenotypic acclimatization to ocean acidification in a reef-building coral. *Sci Adv* 2018;**4**:eaar8028.
- Lin Q, Shang L, Wang X et al. Different dimethylsulphoniopropionate-producing ability of dinoflagellates could affect the structure of their associated bacterial community. *Algal Research* 2021;**57**:102359.
- Lin S, Cheng S, Song B et al. The *Symbiodinium kawagutii* genome illuminates dinoflagellate gene expression and coral symbiosis. *Science* 2015;**350**:691–4.
- Littman R, Willis BL, Bourne DG. Metagenomic analysis of the coral holobiont during a natural bleaching event on the Great Barrier Reef. *Environ Microbiol Rep* 2011;**3**:651–60.
- Liu H, Stephens TG, Gonzalez-Pech RA et al. *Symbiodinium* genomes reveal adaptive evolution of functions related to coral-dinoflagellate symbiosis. *Commun Biol* 2018;**1**:95.
- Liu X, Duan X, Holmes JA et al. A long noncoding RNA regulates Hepatitis C Virus infection through interferon alpha-inducible protein 6. *Hepatology* 2019;**69**:1004–19.
- Lloyd-Price J, Arze C, Ananthakrishnan AN et al. Multi-omics of the gut microbial ecosystem in inflammatory bowel diseases. *Nature* 2019;**569**:655–62.
- Lohr KE, Khattri RB, Guingab-Cagmat J et al. Metabolomic profiles differ among unique genotypes of a threatened Caribbean coral. *Sci Rep* 2019;**9**:6067.
- Lok C. Mining the microbial dark matter. *Nature* 2015;**522**:270.
- Lu Q, Liu T, Tang X, et al. Reformation of tissue balls from tentacle explants of coral *Goniopora lobata*: self-organization process and response to environmental stresses. *In Vitro Cell Dev Biol Anim* 2017;**53**:111–22.
- Lu Y, Jiang J, Zhao H et al. Clade-specific sterol metabolites in dinoflagellate endosymbionts are associated with coral bleaching in response to environmental cues. *mSystems* 2020;**5**:e00765–20. <https://doi.org/10.1128/mSystems.00765-20>
- Luna GM, Bongiorno L, Gili C et al. *Vibrio harveyi* as a causative agent of the white syndrome in tropical stony corals. *Environ Microbiol Rep* 2010;**2**:120–7.
- Ma W, Zhang S, Li Z et al. Enhancing protein function prediction performance by utilizing AlphaFold-predicted protein structures. *J Chem Inf Model* 2022;**62**:4008–17.
- Maire J, Girvan SK, Barkla SE et al. Intracellular bacteria are common and taxonomically diverse in cultured and in hospite algal endosymbionts of coral reefs. *ISME J* 2021;**15**:2028–42.
- Mansfield KM, Carter NM, Nguyen L et al. Transcription factor NF- $\kappa$ b is modulated by symbiotic status in a sea anemone model of cnidarian bleaching. *Sci Rep* 2017;**7**:1–14.
- Manzoni C, Kia DA, Vandrovicova J et al. Genome, transcriptome and proteome: the rise of omics data and their integration in biomedical sciences. *Briefings Bioinf* 2018;**19**:286–302.
- Maor-Landaw K, van Oppen MJ, McFadden GI. Symbiotic lifestyle triggers drastic changes in the gene expression of the algal endosymbiont *Brevium minutum* (Symbiodiniaceae). *Ecol Evol* 2020;**10**:451–66.
- Marcelino VR, van Oppen MJ, Verbruggen H. Highly structured prokaryote communities exist within the skeleton of coral colonies. *ISME J* 2018;**12**:300–3.
- Marcelino VR, Verbruggen H. Multi-marker metabarcoding of coral skeletons reveals a rich microbiome and diverse evolutionary origins of endolithic algae. *Sci Rep* 2016;**6**:31508.
- Marchese P, Garzoli L, Young R et al. Fungi populate deep-sea coral gardens as well as marine sediments in the Irish Atlantic Ocean. *Environ Microbiol* 2021;**23**:4168–84.
- Marhaver KL, Edwards RA, Rohwer F. Viral communities associated with healthy and bleaching corals. *Environ Microbiol* 2008;**10**:2277–86.
- Maruyama T, Ito M, Wakaoji S et al. Multi-omics analysis reveals cross-organism interactions in coral holobiont. *bioRxiv* 2021. <https://doi.org/10.1101/2021.10.25.465660>.
- Masse A, Domart-Coulon I, Golubic S et al. Early skeletal colonization of the coral holobiont by the microborer *Ulvophyceae Ostreobium* sp. *Sci Rep* 2018;**8**:2293.
- Matsuo Y, Komiya S, Yasumizu Y et al. Full-length 16S rRNA gene amplicon analysis of human gut microbiota using MinION™ nanopore sequencing confers species-level resolution. *BMC Microbiol* 2021;**21**:1–13.
- Matthews JL, Raina JB, Kahlke T et al. Symbiodiniaceae-bacteria interactions: rethinking metabolite exchange in reefs-building corals as multi-partner metabolic networks. *Environ Microbiol* 2020;**22**:1675–87.
- Mayfield AB, Aguilar C, Kolodziej G et al. Shotgun proteomic analysis of thermally challenged reef corals. *Front Mar Sci* 2021;**8**:660153.
- Mayfield AB, Chen YJ, Lu CY, et al. The proteomic response of the reef coral *Pocillopora acuta* to experimentally elevated temperatures. *PLoS One* 2018;**13**:e0192001.
- McKenna V, Archibald JM, Beinart R et al. The Aquatic Symbiosis Genomics Project: probing the evolution of symbiosis across the tree of life. *Wellcome Open Res* 2021;**6**:254.
- McRae CJ, Mayfield AB, Huang W-B et al. Contrasting proteomic responses of adult and larval coral to high temperatures. *Front Mar Sci* 2021;**8**:716124.

- Meunier V, Geissler L, Bonnet S et al. Microbes support enhanced nitrogen requirements of coral holobionts in a high CO<sub>2</sub> environment. *Mol Ecol* 2021;**30**:5888–99.
- Meyer JL, Paul VJ, Raymundo LJ et al. Comparative metagenomics of the polymicrobial black band disease of corals. *Front Microbiol* 2017;**8**:618.
- Meyer JL, Paul VJ, Teplitski M. Community shifts in the surface microbiomes of the coral *Porites astreoides* with unusual lesions. *PLoS One* 2014;**9**:e100316.
- Miro-Blanch J, Yanes O. Epigenetic regulation at the interplay between gut microbiota and host metabolism. *Front Genet* 2019;**10**:638.
- Miura N, Motone K, Takagi T et al. *Ruegeria* sp. strains isolated from the reef-building coral *Galaxea fascicularis* inhibit growth of the temperature-dependent pathogen *Vibrio coralliilyticus*. *Mar Biotechnol* 2019;**21**:1–8. DOI: 10.1007/s10126-018-9853-1.
- Mohamed AR, Andrade N, Moya A et al. Dual RNA-sequencing analyses of a coral and its native symbiont during the establishment of symbiosis. *Mol Ecol* 2020b;**29**:3921–37.
- Mohamed AR, Chan CX, Ragan MA et al. Comparative transcriptomic analyses of *Chromera* and Symbiodiniaceae. *Environ Microbiol Rep* 2020a;**12**:435–43.
- Mohamed AR, Cumbo V, Harii S et al. The transcriptomic response of the coral *Acropora digitifera* to a competent *Symbiodinium* strain: the symbiosome as an arrested early phagosome. *Mol Ecol* 2016;**25**:3127–41.
- Mohamed AR, Cumbo VR, Harii S et al. Deciphering the nature of the coral–chromera association. *ISME J* 2018;**12**:776–90.
- Mohamed AR, Naval-Sanchez M, Menzies M et al. Leveraging transcriptome and epigenome landscapes to infer regulatory networks during the onset of sexual maturation. *BMC Genom* 2022;**23**:1–19.
- Mohamed AR, Sweet M. Current knowledge of coral diseases present within the Red Sea. In: Rasul N, Stewart I (eds.), *Oceanographic and Biological Aspects of the Red Sea*. Cham: Springer, 2019, 387–400.
- Moore JE, Purcaro MJ, Pratt HE et al. Expanded encyclopaedias of DNA elements in the human and mouse genomes. *Nature* 2020;**583**:699–710.
- Moore RB, Obornik M, Janouskovec J et al. A photosynthetic alveolate closely related to apicomplexan parasites. *Nature* 2008;**451**:959–63.
- Morovic W, Budinoff CR. Epigenetics: a new frontier in probiotic research. *Trends Microbiol* 2021;**29**:117–26.
- Morris LA, Voolstra CR, Quigley KM et al. Nutrient availability and metabolism affect the stability of coral–Symbiodiniaceae symbioses. *Trends Microbiol* 2019;**27**:678–89.
- Morrow KM, Bourne DG, Humphrey C et al. Natural volcanic CO<sub>2</sub> seeps reveal future trajectories for host–microbial associations in corals and sponges. *ISME J* 2015;**9**:894–908.
- Motone K, Takagi T, Aburaya S et al. A zeaxanthin-producing bacterium isolated from the algal phycosphere protects coral endosymbionts from environmental stress. *mBio* 2020;**11**:e01019–19.
- Muscatine L, Porter JW. Reef corals: mutualistic symbioses adapted to nutrient-poor environments. *Bioscience* 1977;**27**:454–60.
- Muscatine L. The role of symbiotic algae in carbon and energy flux in reef corals. In: Dubinsky Z (ed.), *Ecosystems of the World*. Amsterdam: Elsevier, 1990, 75–87.
- Nand A, Zhan Y, Salazar OR et al. Genetic and spatial organization of the unusual chromosomes of the dinoflagellate *Symbiodinium microadriaticum*. *Nat Genet* 2021;**53**:618–29.
- Neave MJ, Apprill A, Ferrier-Pagès C et al. Diversity and function of prevalent symbiotic marine bacteria in the genus *Endozoicomonas*. *Appl Microbiol Biotechnol* 2016;**100**:8315–24.
- Neave MJ, Michell CT, Apprill A et al. *Endozoicomonas* genomes reveal functional adaptation and plasticity in bacterial strains symbiotically associated with diverse marine hosts. *Sci Rep* 2017;**7**:40579.
- Neubauer E-F, Poole AZ, Neubauer P et al. A diverse host thrombospondin-type-1 repeat protein repertoire promotes symbiont colonization during establishment of cnidarian–dinoflagellate symbiosis. *eLife* 2017;**6**:e24494.
- Neubauer EF, Poole AZ, Detournay O et al. The scavenger receptor repertoire in six cnidarian species and its putative role in cnidarian–dinoflagellate symbiosis. *PeerJ* 2016;**4**:e2692.
- Nichols RG, Davenport ER. The relationship between the gut microbiome and host gene expression: a review. *Hum Genet* 2021;**140**:747–60.
- Nyholm L, Koziol A, Marcos S et al. Holo-omics: integrated host–microbiota multi-omics for basic and applied biological research. *iScience* 2020;**23**:101414.
- Obornik M, Modry D, Lukes M et al. Morphology, ultrastructure and life cycle of *Vitrella brassicaformis* n. sp., n. gen., a novel chromerid from the Great Barrier Reef. *Protist* 2012;**163**:306–23.
- Ochsenkühn MA, Rothig T, D’Angelo C et al. The role of floridoside in osmoadaptation of coral-associated algal endosymbionts to high-salinity conditions. *Sci Adv* 2017;**3**:e1602047.
- Ochsenkühn MA, Schmitt-Kopplin P, Harir M et al. Coral metabolite gradients affect microbial community structures and act as a disease cue. *Commun Biol* 2018;**1**:184.
- Olson ND, Lesser MP. Diazotrophic diversity in the Caribbean coral, *Montastraea cavernosa*. *Arch Microbiol* 2013;**195**:853–9.
- Park CH, Hong C, Lee A-R et al. Multi-omics reveals microbiome, host gene expression, and immune landscape in gastric carcinogenesis. *iScience* 2022;**25**:103956.
- Parkinson JE, Tivey TR, Mandelare PE et al. Subtle differences in symbiont cell surface glycan profiles do not explain species-specific colonization rates in a model cnidarian–algal symbiosis. *Front Microbiol* 2018;**9**:842.
- Patterson KL, Porter JW, Ritchie KB et al. The etiology of white pox, a lethal disease of the Caribbean elkhorn coral, *Acropora palmata*. *Proc Natl Acad Sci* 2002;**99**:8725–30.
- Peixoto RS, Rosado PM, Leite DC et al. Beneficial microorganisms for corals (BMC): proposed mechanisms for coral health and resilience. *Front Microbiol* 2017;**8**:341.
- Peixoto RS, Sweet M, Villela HDM et al. Coral probiotics: premise, promise, prospects. *Annu Rev Anim Biosci* 2021;**9**:265–88.
- Peng N, He J, Li J et al. Long noncoding RNA MALAT1 inhibits the apoptosis and autophagy of hepatocellular carcinoma cell by targeting the microRNA-146a/PI3K/akt/mTOR axis. *Cancer Cell Int* 2020;**20**:1–11.
- Perez S, Weis V. Nitric oxide and cnidarian bleaching: an eviction notice mediates breakdown of a symbiosis. *J Exp Biol* 2006;**209**:2804–10.
- Pernice M, Meibom A, Van Den Heuvel A et al. A single-cell view of ammonium assimilation in coral–dinoflagellate symbiosis. *ISME J* 2012;**6**:1314–24.
- Pernice M, Raina JB, Radecker N et al. Down to the bone: the role of overlooked endolithic microbiomes in reef coral health. *ISME J* 2020;**14**:325–34.
- Petrou K, Nunn BL, Padula MP et al. Broad scale proteomic analysis of heat-destabilised symbiosis in the hard coral *Acropora millepora*. *Sci Rep* 2021;**11**:19061.

- Pinzon JH, Kamel B, Burge CA et al. Whole transcriptome analysis reveals changes in expression of immune-related genes during and after bleaching in a reef-building coral. *R Soc Open Sci* 2015;**2**:140214.
- Pogoreutz C, Oakley CA, Radecker N et al. Coral holobiont cues prime endozoicomonas for a symbiotic lifestyle. *ISME J* 2022;**16**:1883–95.
- Pogoreutz C, Radecker N, Cardenas A et al. Dominance of endozoicomonas bacteria throughout coral bleaching and mortality suggests structural inflexibility of the *Pocillopora verrucosa* microbiome. *Ecol Evol* 2018;**8**:2240–52.
- Pogoreutz C, Voolstra CR, Radecker N et al. The coral holobiont highlights the dependence of cnidarian animal hosts on their associated microbes. In: Bosch TCG, Hadfield MG, (eds). *Cellular Dialogues in the Holobiont*. Boca Raton: CRC Press, 2020.
- Pollock FJ, McMinds R, Smith S et al. Coral-associated bacteria demonstrate phylosymbiosis and cophylogeny. *Nat Commun* 2018;**9**:4921.
- Pollock FJ, Morris PJ, Willis BL et al. The urgent need for robust coral disease diagnostics. *PLoS Pathog* 2011;**7**:e1002183.
- Pollock FJ, Wada N, Torda G et al. White syndrome-affected corals have a distinct microbiome at disease lesion fronts. *Appl Environ Microbiol* 2017;**83**:e02799–16.
- Poole AZ, Kitchen SA, Weis VM. The role of complement in cnidarian-dinoflagellate symbiosis and immune challenge in the sea anemone *Aiptasia pallida*. *Front Microbiol* 2016;**7**:519.
- Poole AZ, Weis VM. TIR-domain-containing protein repertoire of nine anthozoan species reveals coral-specific expansions and uncharacterized proteins. *Dev Comp Immunol* 2014;**46**:480–8.
- Price MN, Dehal PS, Arkin AP. FastTree 2-approximately maximum-likelihood trees for large alignments. *PLoS One* 2010;**5**:e9490. doi: 10.1371/journal.pone.0009490.
- Puntin G, Craggs J, Hayden R et al. The reef-building coral *Galaxea fascicularis*: a new model system for coral symbiosis. *bioRxiv* 2022. <https://www.biorxiv.org/content/10.1101/2022.06.02.494472v1> (23 February 2023, date last accessed).
- Putnam HM, Gates RD. Preconditioning in the reef-building coral *Pocillopora damicornis* and the potential for trans-generational acclimatization in coral larvae under future climate change conditions. *J Exp Biol* 2015;**218**:2365–72.
- Quast C, Pruesse E, Yilmaz P et al. The SILVA ribosomal RNA gene database project: improved data processing and web-based tools. *Nucleic Acids Res* 2013;**41**:D590–6. doi: 10.1093/nar/gks1219
- Quinn RA, Vermeij MJ, Hartmann AC et al. Metabolomics of reef benthic interactions reveals a bioactive lipid involved in coral defence. *Proc Biol Sci* 2016;**283**:20160469.
- Radecker N, Pogoreutz C, Gegner HM et al. Heat stress destabilizes symbiotic nutrient cycling in corals. *Proc Natl Acad Sci* 2021;**118**:e2022653118.
- Radecker N, Pogoreutz C, Gegner HM et al. Heat stress reduces the contribution of diazotrophs to coral holobiont nitrogen cycling. *ISME J* 2022;**16**:1110–8.
- Radecker N, Pogoreutz C, Voolstra CR et al. Nitrogen cycling in corals: the key to understanding holobiont functioning? *Trends Microbiol* 2015;**23**:490–7.
- Raina JB, Tapiolas D, Motti CA et al. Isolation of an antimicrobial compound produced by bacteria associated with reef-building corals. *PeerJ* 2016;**4**:e2275.
- Raina JB, Tapiolas DM, Foret S et al. DMSP biosynthesis by an animal and its role in coral thermal stress response. *Nature* 2013;**502**:677–80.
- Rao A, Barkley D, França GS et al. Exploring tissue architecture using spatial transcriptomics. *Nature* 2021;**596**:211–20.
- Rasoulouniriana D, Siboni N, Ben-Dov E et al. *Pseudoscillatoria coralii* gen. nov., sp. nov., a cyanobacterium associated with coral black band disease (BBD). *Dis Aquat Organ* 2009;**87**:91–96.
- Ren CZ, Gao HM, Dai J et al. Taxonomic and bioactivity characterizations of *Mameliella alba* strain LZ-28 isolated from highly toxic marine dinoflagellate *Alexandrium catenella* LZT09. *Marine Drugs* 2022;**20**:321.
- Reverter A, Chan EK. Combining partial correlation and an information theory approach to the reversed engineering of gene co-expression networks. *Bioinformatics* 2008;**24**:2491–7.
- Reynaud S, Martinez P, Houlbrèque F et al. Effect of light and feeding on the nitrogen isotopic composition of a zooxanthellate coral: role of nitrogen recycling. *Mar Ecol Prog Ser* 2009;**392**:103–10.
- Richards AL, Muehlbauer AL, Alazizi A et al. Gut microbiota has a widespread and modifiable effect on host gene regulation. *mSystems* 2019;**4**:e00323–18.
- Ritchie KB, Smith GW. Microbial communities of coral surface mucopolysaccharide layers. In: Rosenberg E, Loya Y (eds.), *Coral Health and Disease*. Berlin, Heidelberg: Springer, 2004, 259–64.
- Ritchie KB. Bacterial symbionts of corals and *Symbiodinium*. In: Rosenberg E, Gophna U (eds.), *Beneficial Microorganisms in Multicellular Life Forms*. Berlin, Heidelberg: Springer, 2012, 139–50.
- Ritchie KB. Regulation of microbial populations by coral surface mucus and mucus-associated bacteria. *Mar Ecol Prog Ser* 2006;**322**:1–14.
- Roach TNF, Dilworth J, CM H et al. Metabolomic signatures of coral bleaching history. *Nat Ecol Evol* 2021;**5**:495–503.
- Roach TNF, Little M, Arts MGI et al. A multiomic analysis of in situ coral-turf algal interactions. *Proc Natl Acad Sci* 2020;**117**:13588–95.
- Robbins SJ, Singleton CM, Chan CX et al. A genomic view of the reef-building coral *Porites lutea* and its microbial symbionts. *Nat Microbiol* 2019;**4**:2090–100.
- Roder C, Arif C, Daniels C et al. Bacterial profiling of white plague disease across corals and oceans indicates a conserved and distinct disease microbiome. *Mol Ecol* 2014;**23**:965–74.
- Roder C, Bayer T, Aranda M et al. Microbiome structure of the fungid coral *Ctenactis echinata* aligns with environmental differences. *Mol Ecol* 2015;**24**:3501–11.
- Rohwer F, Seguritan V, Azam F et al. Diversity and distribution of coral-associated bacteria. *Mar Ecol Prog Ser* 2002;**243**:1–10.
- Roik A, Reverter M, Pogoreutz C. A roadmap to understanding diversity and function of coral reef-associated fungi. *FEMS Microbiol Rev* 2022;**46**:6.
- Rosado PM, Leite DCA, Duarte GAS et al. Marine probiotics: increasing coral resistance to bleaching through microbiome manipulation. *ISME J* 2019;**13**:921–36.
- Rose NH, Seneca FO, Palumbi SR. Gene networks in the wild: identifying transcriptional modules that mediate coral resistance to experimental heat stress. *Genome Biol Evol* 2015;**8**:243–52.
- Rosenberg E, Koren O, Reshef L et al. The role of microorganisms in coral health, disease and evolution. *Nat Rev Microbiol* 2007;**5**:355–62.
- Rosenberg E, Zilber-Rosenberg I. The hologenome concept of evolution after 10 years. *Microbiome* 2018;**6**:78.
- Rosic NN, Dove S. Mycosporine-like amino acids from coral dinoflagellates. *Appl Environ Microbiol* 2011;**77**:8478–86.
- Rosic NN. Mycosporine-like amino acids: making the foundation for organic personalised sunscreens. *Marine Drugs* 2019;**17**:638.
- Rosset S, Wiedenmann J, Reed AJ et al. Phosphate deficiency promotes coral bleaching and is reflected by the ultrastructure of symbiotic dinoflagellates. *Mar Pollut Bull* 2017;**118**:180–7.

- Rosset SL, Oakley CA, Ferrier-Pages C et al. The molecular language of the cnidarian–dinoflagellate symbiosis. *Trends Microbiol* 2021;**29**:320–33.
- Röthig T, Ochsenkühn MA, Roik A et al. Long-term salinity tolerance is accompanied by major restructuring of the coral bacterial microbiome. *Mol Ecol* 2016;**25**:1308–23.
- Rubio-Portillo E, Martin-Cuadrado AB, Caraballo-Rodriguez AM et al. Virulence as a side effect of interspecies interaction in *Vibrio* coral pathogens. *mBio* 2020;**11**:e00201–20.
- Rubio-Portillo E, Yarza P, Penalver C et al. New insights into *Oculina patagonica* coral diseases and their associated *Vibrio* spp. communities. *ISME J* 2014;**8**:1794–807.
- Santoro EP, Borges RM, Espinoza JL et al. Coral microbiome manipulation elicits metabolic and genetic restructuring to mitigate heat stress and evade mortality. *Sci Adv* 2021;**7**:eabg3088.
- Santos HF, Carmo FL, Duarte G et al. Climate change affects key nitrogen-fixing bacterial populations on coral reefs. *ISME J* 2014;**8**:2272–9.
- Sato Y, Civiello M, Bell SC et al. Integrated approach to understanding the onset and pathogenesis of black band disease in corals. *Environ Microbiol* 2016;**18**:752–65.
- Sato Y, Ling E, Turaev D et al. Unraveling the microbial processes of black band disease in corals through integrated genomics. *Sci Rep* 2017;**7**:1–14.
- Savary R, Barshis DJ, Voolstra CR et al. Fast and pervasive transcriptomic resilience and acclimation of extremely heat-tolerant coral holobionts from the northern Red Sea. *Proc Natl Acad Sci* 2021;**118**:e2023298118.
- Schlichter D, Zscharnack B, Krisch H. Transfer of photoassimilates from endolithic algae to coral tissue. *Naturwissenschaften* 1995;**82**:561–4.
- Schultz J, Modolon F, Rosado AS et al. Methods and strategies to uncover coral-associated microbial dark matter. *mSystems* 2022;**7**:e00367–22.
- Segev E, Wyche TP, Kim KH et al. Dynamic metabolic exchange governs a marine algal–bacterial interaction. *eLife* 2016;**5**:e17473.
- Semenkovich NP, Planer JD, Ahern PP et al. Impact of the gut microbiota on enhancer accessibility in gut intraepithelial lymphocytes. *Proc Natl Acad Sci* 2016;**113**:14805–10.
- Seneca FO, Palumbi SR The role of transcriptome resilience in resistance of corals to bleaching. *Mol Ecol* 2015;**24**:1467–84.
- Sere MG, Chabanet P, Turquet J et al. Identification and prevalence of coral diseases on three western Indian Ocean coral reefs. *Dis Aquat Organ* 2015;**114**:249–61.
- Sexton AC, Howlett BJ. Parallels in fungal pathogenesis on plant and animal hosts. *Eukaryotic Cell* 2006;**5**:1941–9.
- Seymour JR, Amin SA, Raina JB et al. Zooming in on the phycosphere: the ecological interface for phytoplankton–bacteria relationships. *Nat Microbiol* 2017;**2**:17065.
- Sharma M, Li Y, Stoll ML et al. The epigenetic connection between the gut microbiome in obesity and diabetes. *Front Genet* 2020;**10**:1329.
- Shibl AA, Isaac A, Ochsenkühn MA et al. Diatom modulation of select bacteria through use of two unique secondary metabolites. *Proc Natl Acad Sci* 2020;**117**:27445–55.
- Shinzato C, Shoguchi E, Kawashima T et al. Using the *Acropora digitifera* genome to understand coral responses to environmental change. *Nature* 2011;**476**:320–323.
- Shnit-Orland M, Sivan A, Kushmaro A. Antibacterial activity of pseudoalteromonas in the coral holobiont. *Microb Ecol* 2012;**64**:851–9.
- Shoguchi E, Shinzato C, Kawashima T et al. Draft assembly of the *Symbiodinium minutum* nuclear genome reveals dinoflagellate gene structure. *Curr Biol* 2013;**23**:1399–408.
- Siboni N, Ben-Dov E, Sivan A et al. Geographic specific coral-associated ammonia-oxidizing archaea in the northern Gulf of Eilat (Red Sea). *Microb Ecol* 2012;**64**:18–24.
- Siboni N, Ben-Dov E, Sivan A et al. Global distribution and diversity of coral-associated archaea and their possible role in the coral holobiont nitrogen cycle. *Environ Microbiol* 2008;**10**:2979–90.
- Sogin EM, Putnam HM, Nelson CE et al. Correspondence of coral holobiont metabolome with symbiotic bacteria, archaea and *Symbiodinium* communities. *Environ Microbiol Rep* 2017;**9**:310–5.
- Stalder T, Press MO, Sullivan S et al. Linking the resistome and plasmidome to the microbiome. *ISME J* 2019;**13**:2437–46.
- Statello L, Guo C-J, Chen L-L et al. Gene regulation by long non-coding RNAs and its biological functions. *Nat Rev Mol Cell Biol* 2021;**22**:96–118.
- Stephens TG, Ragan MA, Bhattacharya D et al. Core genes in diverse dinoflagellate lineages include a wealth of conserved dark genes with unknown functions. *Sci Rep* 2018;**8**:1–11.
- Stephens TG, Strand EL, Mohamed AR et al. Ploidy variation and its implications for reproduction and population dynamics in two sympatric Hawaiian coral species. *bioRxiv* 2021.11.21.469467. <https://doi.org/10.1101/2021.11.21.469467>
- Stien D, Suzuki M, Rodrigues AMS et al. A unique approach to monitor stress in coral exposed to emerging pollutants. *Sci Rep* 2020;**10**:9601.
- Sun S, Jones RB, Fodor AA. Inference-based accuracy of metagenome prediction tools varies across sample types and functional categories. *Microbiome* 2020;**8**:1–9.
- Sweet M, Burian A, Fifer J et al. Compositional homogeneity in the pathobiome of a new, slow-spreading coral disease. *Microbiome* 2019;**7**:139.
- Sweet M, Jones R, Bythell J. Coral diseases in aquaria and in nature. *J Mar Biol Assoc UK* 2012;**92**:791–801.
- Sweet M, Vilella H, Keller-Costa T et al. Insights into the cultured bacterial fraction of corals. *mSystems* 2021;**6**:e0124920.
- Sweet MJ, Croquer A, Bythell JC. Bacterial assemblages differ between compartments within the coral holobiont. *Coral Reefs* 2010;**30**:39–52.
- Tandon K, Lu CY, Chiang PW et al. Comparative genomics: dominant coral–bacterium *Endozoicomonas acroporae* metabolizes dimethylsulfoniopropionate (DMSP). *ISME J* 2020;**14**:1290–303.
- Thomou T, Mori MA, Dreyfuss JM et al. Adipose-derived circulating miRNAs regulate gene expression in other tissues. *Nature* 2017;**542**:450–5.
- Thompson FL, Barash Y, Sawabe T et al. *Thalassomonas loyana* sp. nov., a causative agent of the white plague-like disease of corals on the Eilat coral reef. *Int J Syst Evol Microbiol* 2006;**56**:365–8.
- Thurber RL, Barott KL, Hall D et al. Metagenomic analysis indicates that stressors induce production of herpes-like viruses in the coral *Porites compressa*. *Proc Natl Acad Sci* 2008;**105**:18413–8.
- Thurber RV, Payet JP, Thurber AR et al. Virus–host interactions and their roles in coral reef health and disease. *Nat Rev Microbiol* 2017;**15**:205–16.
- Toller W, Rowan R, Knowlton N. Genetic evidence for a protozoan (phylum Apicomplexa) associated with corals of the *Montastraea annularis* species complex. *Coral Reefs* 2002;**21**:143–6.
- Tong H, Cai L, Zhou G et al. Correlations between prokaryotic microbes and stress-resistant algae in different corals subjected to environmental stress in Hong Kong. *Front Microbiol* 2020;**11**:686.
- Torda G, Donelson JM, Aranda M et al. Rapid adaptive responses to climate change in corals. *Nat Clim Chang* 2017;**7**:627–36.
- Upton SJ, Peters EC. A new and unusual species of coccidium (Apicomplexa: Agamococcidiorida) from Caribbean scleractinian corals. *J Invertebr Pathol* 1986;**47**:184–93.



- Ushijima B, Smith A, Aeby GS et al. *Vibrio owensii* induces the tissue loss disease *Montipora* white syndrome in the Hawaiian reef coral *Montipora capitata*. *PLoS One* 2012;**7**:e46717.
- Ushijima B, Videau P, Poscablo D et al. Complete genome sequence of *Vibrio coralliilyticus* strain OCN014, isolated from a diseased coral at Palmyra Atoll. *Genome Announc* 2014;**2**:e01318–14.
- Valadi H, Ekström K, Bossios A et al. Exosome-mediated transfer of mRNAs and microRNAs is a novel mechanism of genetic exchange between cells. *Nat Cell Biol* 2007;**9**:654–9.
- van de Water J, Chaib De Mares M, Dixon GB et al. Antimicrobial and stress responses to increased temperature and bacterial pathogen challenge in the holobiont of a reef-building coral. *Mol Ecol* 2018;**27**:1065–80.
- van Oppen MJ, Oliver JK, Putnam HM et al. Building coral reef resilience through assisted evolution. *Proc Natl Acad Sci* 2015;**112**:2307–13.
- van Oppen MJH, Blackall LL. Coral microbiome dynamics, functions and design in a changing world. *Nat Rev Microbiol* 2019;**17**:557–67.
- van Oppen MJH, Gates RD, Blackall LL et al. Shifting paradigms in restoration of the world's coral reefs. *Global Change Biol* 2017;**23**:3437–48.
- Vanwonderghem I, Webster NS. Coral reef microorganisms in a changing climate. *iScience* 2020;**23**:100972.
- Varasteh T, Hamerski L, Tschoeke D et al. Conserved pigment profiles in phylogenetically diverse symbiotic bacteria associated with the corals *Montastraea cavernosa* and *Mussismilia braziliensis*. *Microb Ecol* 2021;**81**:267–77.
- Varasteh T, Moreira APB, Silva Lima AW et al. Genomic repertoire of *Mameliella alba* Ep20 associated with *Symbiodinium* from the endemic coral *Mussismilia braziliensis*. *Symbiosis* 2020;**80**:53–60.
- Verbruggen H, Marcelino VR, Guiry MD et al. Phylogenetic position of the coral symbiont *Ostreobium* (Ulvophyceae) inferred from chloroplast genome data. *J Phycol* 2017;**53**:790–803.
- Viennois E, Chassaing B, Tahsin A et al. Host-derived fecal microRNAs can indicate gut microbiota healthiness and ability to induce inflammation. *Theranostics* 2019;**9**:4542.
- Vilela CLS, Villela HDM, Duarte GAS et al. Estrogen induces shift in abundances of specific groups of the coral microbiome. *Sci Rep* 2021;**11**:2767.
- Visca P, Imperi F, Lamont IL. Pyoverdine siderophores: from biogenesis to biosignificance. *Trends Microbiol* 2007;**15**:22–30.
- Vohsen SA, Anderson KE, Gade AM et al. Deep-sea corals provide new insight into the ecology, evolution, and the role of plastids in widespread apicomplexan symbionts of anthozoans. *Microbiome* 2020;**8**:34.
- Vohsen SA, Fisher CR, Baums IB. Metabolomic richness and fingerprints of deep-sea coral species and populations. *Metabolomics* 2019;**15**:34.
- Voolstra CR, Suggett DJ, Peixoto RS et al. Extending the natural adaptive capacity of coral holobionts. *Nat Rev Earth Environ* 2021a;**2**:747–62.
- Voolstra CR, Valenzuela JJ, Turkarslan S et al. Contrasting heat stress response patterns of coral holobionts across the Red Sea suggest distinct mechanisms of thermal tolerance. *Mol Ecol* 2021b;**30**:4466–80.
- Voolstra CR, Ziegler M. Adapting with microbial help: microbiome flexibility facilitates rapid responses to environmental change. *BioEssays* 2020;**42**:2000004.
- Wada N, Hsu M-T, Tandon K et al. High-resolution spatial and genomic characterization of coral-associated microbial aggregates in the coral *Stylophora pistillata*. *Sci Adv* 2022;**8**:eabo2431.
- Wang J, Douglas A. Essential amino acid synthesis and nitrogen recycling in an alga-invertebrate symbiosis. *Mar Biol* 1999;**135**:219–22.
- Wangpraseurt D, Jacques SL, Petrie T et al. Monte Carlo modeling of photon propagation reveals highly scattering coral tissue. *Front Plant Sci* 2016;**7**:1404.
- Weber L, Gonzalez-Díaz P, Armenteros M et al. The coral ecosphere: a unique coral reef habitat that fosters coral-microbial interactions. *Limnol Oceanogr* 2019;**64**:2373–88.
- Wegley Kelly L, Nelson CE, Aluwihare LI et al. Molecular commerce on coral reefs: using metabolomics to reveal biochemical exchanges underlying holobiont biology and the ecology of coastal ecosystems. *Front Mar Sci* 2021;**8**:630799.
- Wegley L, Edwards R, Rodriguez-Brito B et al. Metagenomic analysis of the microbial community associated with the coral *Porites astreoides*. *Environ Microbiol* 2007;**9**:2707–19.
- Wegley L, Yu Y, Breitbart M et al. Coral-associated archaea. *Mar Ecol Prog Ser* 2004;**273**:89–96.
- Weis VM. Cell biology of coral symbiosis: foundational study can inform solutions to the coral reef crisis. *Integr Comp Biol* 2019;**59**:845–55.
- Weis VM. Cellular mechanisms of cnidarian bleaching: stress causes the collapse of symbiosis. *J Exp Biol* 2008;**211**:3059–66.
- Weiss Y, Foret S, Hayward DC et al. The acute transcriptional response of the coral *Acropora millepora* to immune challenge: expression of GMAP/IAN genes links the innate immune responses of corals with those of mammals and plants. *BMC Genom* 2013;**14**:400.
- Weizman E, Levy O. The role of chromatin dynamics under global warming response in the symbiotic coral model *Aiptasia*. *Commun Biol* 2019;**2**:282.
- Welsh RM, Rosales SM, Zaneveld JR et al. Alien vs. predator: bacterial challenge alters coral microbiomes unless controlled by *Halobacteriovorax* predators. *PeerJ* 2017;**5**:e3315.
- Welsh RM, Zaneveld JR, Rosales SM et al. Bacterial predation in a marine host-associated microbiome. *ISME J* 2016;**10**:1540–4.
- Wemheuer F, Taylor JA, Daniel R et al. Tax4Fun2: prediction of habitat-specific functional profiles and functional redundancy based on 16S rRNA gene sequences. *Environ Microbiome* 2020;**15**:11. <https://doi.org/10.1186/s40793-020-00358-7>
- Weynberg KD, Laffy PW, Wood-Charlson EM et al. Coral-associated viral communities show high levels of diversity and host auxiliary functions. *PeerJ* 2017;**5**:e4054.
- Weynberg KD, Wood-Charlson EM, Suttle CA et al. Generating viral metagenomes from the coral holobiont. *Front Microbiol* 2014;**5**:206.
- Wiedenmann J, D'Angelo C, Smith EG et al. Nutrient enrichment can increase the susceptibility of reef corals to bleaching. *Nat Clim Change* 2013;**3**:160–4.
- Williams A, Chiles EN, Conetta D et al. Metabolomic shifts associated with heat stress in coral holobionts. *Sci Adv* 2021a;**7**:eabd4210.
- Williams A, Pathmanathan JS, Stephens TG et al. Multi-omic characterization of the thermal stress phenome in the stony coral *Montipora capitata*. *PeerJ* 2021b;**9**:e12335.
- Williams LM, Fuess LE, Brennan JJ et al. A conserved Toll-like receptor-to-NF- $\kappa$ B signaling pathway in the endangered coral *Orbicella faveolata*. *Dev Comp Immunol* 2018;**79**:128–36.
- Wilson WH, Dale AL, Davy JE et al. An enemy within? Observations of virus-like particles in reef corals. *Coral Reefs* 2004;**24**:145–8.
- Winzer K, Williams P. Quorum sensing and the regulation of virulence gene expression in pathogenic bacteria. *Int J Med Microbiol* 2001;**291**:131–43.
- Wolfowicz I, Baumgarten S, Voss PA et al. *Aiptasia* sp. Larvae as a model to reveal mechanisms of symbiont selection in cnidarians. *Sci Rep* 2016;**6**:1–12.

- Wood-Charlson EM, Hollingsworth LL, Krupp DA et al. Lectin/glycan interactions play a role in recognition in a coral/dinoflagellate symbiosis. *Cell Microbiol* 2006;**8**:1985–93.
- Wooldridge SA. Breakdown of the coral–algae symbiosis: towards formalising a linkage between warm-water bleaching thresholds and the growth rate of the intracellular zooxanthellae. *Biogeosciences* 2013;**10**:1647–58.
- Work TM, Aeby GS. Systematically describing gross lesions in corals. *Dis Aquat Organ* 2006;**70**:155–60.
- Work TM, Weatherby TM, Landsberg JH et al. Viral-like particles are associated with endosymbiont pathology in Florida corals affected by stony coral tissue loss disease. *Front Mar Sci* 2021;**8**:750658.
- Wouters J, Kalender-Atak Z, Minnoye L et al. Robust gene expression programs underlie recurrent cell states and phenotype switching in melanoma. *Nat Cell Biol* 2020;**22**:986–98.
- Wright RM, Aglyamova GV, Meyer E et al. Gene expression associated with white syndromes in a reef building coral, *Acropora hyacinthus*. *BMC Genom* 2015;**16**:371.
- Xu L, Pierroz G, Wipf HM-L et al. Holo-omics for deciphering plant–microbiome interactions. *Microbiome* 2021b;**9**:1–11.
- Xu W, Chen T, Pei Y et al. Characterization of shallow whole-metagenome shotgun sequencing as a high-accuracy and low-cost method by complicated mock microbiomes. *Front Microbiol* 2021a;**12**:678319.
- Yan F, Powell DR, Curtis DJ et al. From reads to insight: a hitchhiker’s guide to ATAC-seq data analysis. *Genome Biol* 2020;**21**:1–16.
- Yang J, Shin T-S, Kim JS et al. A new horizon of precision medicine: combination of the microbiome and extracellular vesicles. *Exp Mol Med* 2022;**54**:466–82.
- Yang S, Sun W, Zhang F et al. Phylogenetically diverse denitrifying and ammonia-oxidizing bacteria in corals *Alcyonium gracillimum* and *Tubastraea coccinea*. *Mar Biotechnol* 2013;**15**:540–51.
- Yarden O. Fungal association with sessile marine invertebrates. *Front Microbiol* 2014;**5**:228.
- Yellowlees D, Rees TAV, Leggat W. Metabolic interactions between algal symbionts and invertebrate hosts. *Plant Cell Environ* 2008;**31**:679–94.
- Yoshioka Y, Yamashita H, Suzuki G et al. Whole-genome transcriptome analyses of native symbionts reveal host coral genomic novelties for establishing coral–algae symbioses. *Genome Biol Evol* 2021;**13**:evaa240.
- Yu D-H, Gadkari M, Zhou Q et al. Postnatal epigenetic regulation of intestinal stem cells requires DNA methylation and is guided by the microbiome. *Genome Biol* 2015;**16**:1–16.
- Yu X, Zhang Y, Li T et al. Long non-coding RNA linc-RAM enhances myogenic differentiation by interacting with MyoD. *Nat Commun* 2017;**8**:1–12.
- Yum LK, Baumgarten S, Röthig T et al. Transcriptomes and expression profiling of deep-sea corals from the Red Sea provide insight into the biology of azooxanthellate corals. *Sci Rep* 2017;**7**:1–11.
- Yuyama I, Ishikawa M, Nozawa M et al. Transcriptomic changes with increasing algal symbiont reveal the detailed process underlying establishment of coral–algal symbiosis. *Sci Rep* 2018;**8**:16802.
- Zaneveld JR, Burkepille DE, Shantz AA et al. Overfishing and nutrient pollution interact with temperature to disrupt coral reefs down to microbial scales. *Nat Commun* 2016;**7**:11833.
- Zhang Q, Cao X. Epigenetic regulation of the innate immune response to infection. *Nat Rev Immunol* 2019;**19**:417–32.
- Zhang Q, Lou Y, Yang J et al. Integrated multiomic analysis reveals comprehensive tumour heterogeneity and novel immunophenotypic classification in hepatocellular carcinomas. *Gut* 2019;**68**:2019–31.
- Zhenyu X, Shaowen K, Chaoqun H et al. First characterization of bacterial pathogen, *Vibrio alginolyticus*, for *Porites andrewsi* white syndrome in the South China Sea. *PLoS One* 2013;**8**:e75425.
- Ziegler M, Grupstra CGB, Barreto MM et al. Coral bacterial community structure responds to environmental change in a host-specific manner. *Nat Commun* 2019;**10**:3092.
- Ziegler M, Roik A, Porter A et al. Coral microbial community dynamics in response to anthropogenic impacts near a major city in the Central Red Sea. *Mar Pollut Bull* 2016;**105**:629–40.
- Ziegler M, Seneca FO, Yum LK et al. Bacterial community dynamics are linked to patterns of coral heat tolerance. *Nat Commun* 2017;**8**:14213.
- Zilber-Rosenberg I, Rosenberg E. Microbial-driven genetic variation in holobionts. *FEMS Microbiol Rev* 2021;**45**:fuab022.
- Zolti A, Green SJ, Sela N et al. The microbiome as a biosensor: functional profiles elucidate hidden stress in hosts. *Microbiome* 2020;**8**:1–18.
